# Supplementary material
Source: PubMed Central journal article supplement (PMC11213271)

## SUPPLEMENTARY:

### Structural basis for designing multi-epitope vaccines against novel coronavirus 19 infection, the ongoing pandemic emergency: an in silico approach

Sukrit Srivastava<sup>†a,b</sup>, Sonia Verma<sup>c</sup>, Mohit Kamthania<sup>d</sup>, Rupinder Kaur<sup>e</sup>, Ruchi Kiran Badyal<sup>f</sup>, Ajay Kumar Saxena<sup>b</sup>, Ho-Joon Shin<sup>g</sup>, Michael Kolbe<sup>h,l</sup>, Kailash C Pandey<sup>c</sup>

- a Infection Biology Group, Department of Biotechnology, Institute of Bio-Medical Education and Research, Mangalayatan University, 202146 Aligarh, India.  
b Molecular Medicine Lab., School of Life Science, Jawaharlal Nehru University, 110067 New Delhi, India.  
c Parasite-Host Biology Group, Protein Biochemistry & Engineering Lab, ICMR-National Institute of Malaria Research, New Delhi, India  
d Department of Biotechnology, Institute of Applied Medicines and Research, 201206 Ghaziabad, India.  
e Department of Chemistry, Guru Nanak Dev University, Amritsar, India  
f Department of economics, Mangalayata University, India  
g Department of Microbiology, School of Medicine, Ajou University, South Korea  
h Department for Structural Infection Biology, Centre for Structural Systems Biology (CSSB) & Helmholtz-Centre for Infection Research, Notkestraße 85, 22607 Hamburg, Germany.  
i Faculty of Mathematics, Informatics and Natural Sciences, University of Hamburg, Rothenbaumchaussee 19, 20148 Hamburg, Germany.

<sup>†</sup>Correspondence should be addressed to S.S.

(sukrit.srivastav@mangalayatan.edu.in; srivastav.sukrit@gmail.com)

**Supplementary table S1.** Homology modeling for HLA alleles. Tertiary structures of HLA alleles were modeled by homology modeling using SwissModel server. Templates were chosen with the highest sequence identity. Generated models with acceptable QMEAN values were chosen for further studies.

| S.No | HLA Class I Allele  | Template used for modeling | % sequence identity | QMEAN   |
|------|---------------------|----------------------------|---------------------|---------|
| 1    | A*31:01             | 6o9b.1.A                   | 94.29%              | 0.73    |
| 2    | A*11:01             | 6o9b.1.A                   | 97.50%              | 1.14    |
| S.No | HLA Class II Allele | Template used for modeling | % sequence identity | QMEAN   |
| 3    | DRB3*01:01          | 4is6.1.B                   | 90.10%              | (-)1.84 |
| 4    | DRB1*09:01          | 1bx2.1.B                   | 87.43%              | (-)0.46 |

**Supplementary table S2.** INF- $\gamma$  epitopes from CTL and HTL MEVs. INF- $\gamma$  inducing (POSITIVE) epitopes from CTL and HTL MEVs were screened by using “Motif and SVM hybrid” (MERC1 & SVM) approach.

| CLT Epitopes also predicted to be IFN-gamma epitopes |           |                  |        |          |       |
|------------------------------------------------------|-----------|------------------|--------|----------|-------|
| S.No                                                 | Start-END | Sequence         | Method | Result   | Score |
| 1                                                    | 67-82     | RWANQCIFGHSPRQQ  | MERCI  | POSITIVE | 2     |
| 2                                                    | 68-83     | WANQCIFGHSPRQQR  | MERCI  | POSITIVE | 2     |
| 3                                                    | 69-84     | ANQCIFGHSPRQQRE  | MERCI  | POSITIVE | 2     |
| 4                                                    | 70-85     | NQCIFGHSPRQQREG  | MERCI  | POSITIVE | 2     |
| 5                                                    | 71-86     | QCIFGHSPRQQREGV  | MERCI  | POSITIVE | 2     |
| 6                                                    | 83-98     | EGVGENVYAYWSSVS  | MERCI  | POSITIVE | 1     |
| 7                                                    | 84-99     | GVGENVYAYWSSVSV  | MERCI  | POSITIVE | 2     |
| 8                                                    | 120-135   | LYENNPSNNMTWKVA  | MERCI  | POSITIVE | 1     |
| 9                                                    | 121-136   | YENNPSNNMTWKVAG  | MERCI  | POSITIVE | 1     |
| 10                                                   | 122-137   | ENNPSNNMTWKVAGQ  | MERCI  | POSITIVE | 2     |
| 11                                                   | 413-428   | CTDDNALAYYGGGGS  | MERCI  | POSITIVE | 1     |
| 12                                                   | 428-443   | TDDNALAYYGGGSM   | MERCI  | POSITIVE | 1     |
| 13                                                   | 429-444   | DDNALAYYGGGSMY   | MERCI  | POSITIVE | 1     |
| 14                                                   | 439-454   | GGGSSIIINNTVYTK  | MERCI  | POSITIVE | 1     |
| 15                                                   | 440-455   | GGGSSIIINNTVYTKG | MERCI  | POSITIVE | 2     |
| 16                                                   | 441-456   | GGSSIIINNTVYTKGG | MERCI  | POSITIVE | 3     |
| 17                                                   | 442-457   | GSSIINNTVYTKGGG  | MERCI  | POSITIVE | 3     |
| 18                                                   | 443-458   | SSIINNTVYTKGGGG  | MERCI  | POSITIVE | 3     |
| 19                                                   | 444-459   | SIINNTVYTKGGGGS  | MERCI  | POSITIVE | 3     |
| 20                                                   | 445-460   | IINNTVYTKGGGGSL  | MERCI  | POSITIVE | 3     |
| HLT Epitopes also predicted to be IFN-gamma epitopes |           |                  |        |          |       |
| S.No                                                 | Start-END | Sequence         | Method | Result   | Score |
| 1                                                    | 67-82     | RWANQCIFGHSPRQQ  | MERCI  | POSITIVE | 2     |
| 2                                                    | 68-83     | WANQCIFGHSPRQQR  | MERCI  | POSITIVE | 2     |
| 3                                                    | 69-84     | ANQCIFGHSPRQQRE  | MERCI  | POSITIVE | 2     |
| 4                                                    | 70-85     | NQCIFGHSPRQQREG  | MERCI  | POSITIVE | 2     |
| 5                                                    | 71-86     | QCIFGHSPRQQREGV  | MERCI  | POSITIVE | 2     |
| 6                                                    | 83-98     | EGVGENVYAYWSSVS  | MERCI  | POSITIVE | 1     |
| 7                                                    | 84-99     | GVGENVYAYWSSVSV  | MERCI  | POSITIVE | 2     |
| 8                                                    | 120-135   | LYENNPSNNMTWKVA  | MERCI  | POSITIVE | 1     |
| 9                                                    | 121-136   | YENNPSNNMTWKVAG  | MERCI  | POSITIVE | 1     |
| 10                                                   | 122-137   | ENNPSNNMTWKVAGQ  | MERCI  | POSITIVE | 2     |
| 11                                                   | 585-600   | GGGGSFAWWTAFVTN  | MERCI  | POSITIVE | 1     |
| 12                                                   | 586-601   | GGGGSFAWWTAFVTNV | MERCI  | POSITIVE | 1     |
| 13                                                   | 587-602   | GGFAWWTAFVTNVN   | MERCI  | POSITIVE | 1     |
| 14                                                   | 588-603   | GSFAWWTAFVTNVNA  | MERCI  | POSITIVE | 1     |
| 15                                                   | 589-604   | SFAWWTAFVTNVNAS  | MERCI  | POSITIVE | 1     |
| 16                                                   | 560-575   | FAWWTAFVTNVNASS  | MERCI  | POSITIVE | 1     |
| 17                                                   | 561-576   | AWWTAFVTNVNASSG  | MERCI  | POSITIVE | 1     |
| 18                                                   | 806-821   | GGGCTQHQPYYVDD   | MERCI  | POSITIVE | 1     |
| 19                                                   | 807-822   | GGCTQHQPYYVDDP   | MERCI  | POSITIVE | 1     |
| 20                                                   | 808-823   | GSCTQHQPYYVDDPC  | MERCI  | POSITIVE | 1     |

**Supplementary table S3.** Refinement models of CTL and HTL MEVs. Both the CTL and HTL MEVs models were refined by GalaxyWEB server. After refinement, in particular the Rama favored residues increased significantly.

| Galaxy Refinement for CTL MEV |        |       |            |             |               |              |
|-------------------------------|--------|-------|------------|-------------|---------------|--------------|
| Model                         | GDT-HA | RMSD  | Mol Probit | Clash score | Poor rotamers | Rama favored |
| Initial                       | 1.0000 | 0.000 | 3.749      | 100.5       | 4.5           | 75.8         |
| MODEL 1                       | 0.9371 | 0.459 | 2.539      | 23.2        | 0.4           | 83.6         |
| Galaxy Refinement for HTL MEV |        |       |            |             |               |              |
| Initial                       | 1.0000 | 0.000 | 3.554      | 131.2       | 2.2           | 81.3         |
| MODEL 1                       | 0.9552 | 0.402 | 2.537      | 27.9        | 0.7           | 87.7         |

**Supplementary table S4. B Cell linear epitopes of CTL MEVs. Linear B Cell epitopes predicted by ElliPro (IEDB) from CTL MEVs.**

| CTL Multi-Epitope vaccine model linear epitopes |       |     |                                                                                                         |                    |       |
|-------------------------------------------------|-------|-----|---------------------------------------------------------------------------------------------------------|--------------------|-------|
| S.No.                                           | Start | End | Peptide                                                                                                 | Number of residues | Score |
| 1                                               | 1     | 97  | IVVAVTGYNCPGGKLTALERKKIVGQNNKYRSDLINGLKNRNGTY<br>MPRGKNMLELTWDCCKLESSAQRWANQCIFGHSPRQQREGVGENVYAYWSSV   | 97                 | 0.828 |
| 2                                               | 604   | 704 | LRARVSPKGGGGSFLAFLFLVGGGGSHFYSKWYIRGGGGSWTAG<br>AAAYYVGGGGSFPNITNLCPFGGGGSNYNYLYRLFRGGGGSNYLYRLFRHHHHHH | 101                | 0.812 |
| 3                                               | 400   | 415 | LNGSCGSVGGGGGSCTD                                                                                       | 16                 | 0.693 |
| 4                                               | 265   | 277 | SSEMVMCGGSLYG                                                                                           | 13                 | 0.678 |
| 5                                               | 422   | 438 | GGGGSCTDDNALAYYGG                                                                                       | 17                 | 0.662 |
| 6                                               | 584   | 596 | FGGGGSRARVSP                                                                                            | 13                 | 0.619 |
| 7                                               | 219   | 231 | GGGSKPRQKRTAT                                                                                           | 13                 | 0.618 |
| 8                                               | 490   | 502 | WSMATYYGGGGSY                                                                                           | 13                 | 0.618 |
| 9                                               | 294   | 304 | GGGSISNSWLM                                                                                             | 11                 | 0.607 |
| 10                                              | 362   | 372 | FYGGGGSFLFV                                                                                             | 11                 | 0.599 |
| 11                                              | 380   | 393 | GGGSRVYFRLTLGVY                                                                                         | 14                 | 0.599 |
| 12                                              | 320   | 327 | KGGGGSQE                                                                                                | 8                  | 0.55  |
| 13                                              | 445   | 456 | GLPWNVVRGGGG                                                                                            | 12                 | 0.548 |
| 14                                              | 99    | 109 | VEGLKKTAGTD                                                                                             | 11                 | 0.547 |
| 15                                              | 342   | 349 | FNVPMEKG                                                                                                | 8                  | 0.534 |
| 16                                              | 521   | 524 | ASFY                                                                                                    | 4                  | 0.528 |
| 17                                              | 464   | 477 | VYTKGGGGSPLPVNV                                                                                         | 14                 | 0.511 |

**Supplementary table S5. B Cell discontinuous epitopes of CTL MEVs. Discontinuous B Cell epitopes predicted by ElliPro (IEDB) from CTL MEVs.**

| CTL Multi-Epitope vaccine model discontinuous epitopes |                                                                                                                                                                                                                                                                                                                                                                                                                                                                                                                                                                                                                                                                                                                                                                                                                                                                                                                                                                                                                                                                                                                                                                                                                                                                                                                                                                                                                                                                                                                                                                                                                                                                                                                                                            |                    |       |
|--------------------------------------------------------|------------------------------------------------------------------------------------------------------------------------------------------------------------------------------------------------------------------------------------------------------------------------------------------------------------------------------------------------------------------------------------------------------------------------------------------------------------------------------------------------------------------------------------------------------------------------------------------------------------------------------------------------------------------------------------------------------------------------------------------------------------------------------------------------------------------------------------------------------------------------------------------------------------------------------------------------------------------------------------------------------------------------------------------------------------------------------------------------------------------------------------------------------------------------------------------------------------------------------------------------------------------------------------------------------------------------------------------------------------------------------------------------------------------------------------------------------------------------------------------------------------------------------------------------------------------------------------------------------------------------------------------------------------------------------------------------------------------------------------------------------------|--------------------|-------|
| S.No.                                                  | Residues                                                                                                                                                                                                                                                                                                                                                                                                                                                                                                                                                                                                                                                                                                                                                                                                                                                                                                                                                                                                                                                                                                                                                                                                                                                                                                                                                                                                                                                                                                                                                                                                                                                                                                                                                   | Number of residues | Score |
| 1                                                      | I1, V2, V3, A4, V5, T6, G7, Y8, N9, C10, P11, G12, G13, K14, L15, T16, A17, L18, E19, R20, K21, K22, I23, V24, G25, Q26, N27, N28, K29, Y30, R31, S32, D33, L34, I35, N36, G37, K38, L39, K40, N41, R42, N43, G44, T45, Y46, M47, P48, R49, G50, K51, N52, M53, L54, E55, L56, T57, W58, D59, C60, K61, L62, E63, S64, S65, A66, Q67, R68, W69, A70, N71, Q72, C73, I74, F75, G76, H77, S78, P79, R80, Q81, Q82, R83, E84, G85, V86, G87, E88, N89, V90, Y91, A92, Y93, W94, S95, S96, V97, S98, V99, E100, G101, L102, K103, K104, T105, G107, T108, D109, K112, W114, W115, N125, P126, S127, N128, N129, K133, V134, A135, G136                                                                                                                                                                                                                                                                                                                                                                                                                                                                                                                                                                                                                                                                                                                                                                                                                                                                                                                                                                                                                                                                                                                         | 120                | 0.767 |
| 2                                                      | G160, A187, R188, G189, G219, G220, G221, S222, K223, P224, R225, Q226, R228, T229, A230, T231, G246, G247, G248, G249, S250, G264, S265, S266, E267, M268, V269, M270, C271, G272, G273, S274, L275, Y276, G277, G294, G295, G296, S297, I298, S299, N300, S301, W302, L303, M304, K320, G321, G322, G323, G324, S325, Q326, E327, I328, T341, F342, N343, V344, P345, M346, E347, K348, G349, Y363, G364, G365, G366, G367, S368, F369, L370, F371, V372, A374, G380, G381, G382, S383, R384, Y385, F386, R387, L388, T389, L390, G391, V392, L400, N401, G402, S403, C404, G405, S406, V407, G408, G409, G410, G411, S412, C413, T414, D415, G422, G423, G424, G425, S426, C427, T428, D429, D430, N431, A432, L433, A434, Y435, Y436, G445, L446, P447, W448, N449, V450, V451, R452, G453, G454, G455, G456, G469, G470, G471, S472, L473, P474, V475, N476, V477, W490, M492, A493, T494, Y495, Y496, G497, G498, G499, G500, S501, Y502, A521, S522, F523, Y524, I546, P547, Y548, N549, S550, K564, V565, S566, I567, W568, F584, G585, G586, G587, G588, S589, R590, A591, R592, S593, V594, S595, P596, G598, G599, G600, G601, Q603, L604, R605, A606, R607, S608, V609, S610, P611, K612, G613, G614, G615, G616, S617, F618, L619, A620, F621, L622, L623, F624, L625, V626, G627, G628, G629, K634, S631, H632, F633, Y634, S635, K636, W637, Y638, I639, R640, G641, G642, G643, G644, S645, W646, T647, A648, G649, A650, A651, A652, Y653, Y654, V655, G656, G657, G658, G659, S660, F661, P662, N663, I664, T665, N666, L667, C668, P669, F670, G671, G672, G673, G674, S675, N676, Y677, N678, Y679, L680, Y681, R682, L683, F684, G686, G687, G688, G689, S690, N691, Y692, L693, Y694, R695, R698, H699, H700, H701, H702, H703, H704 | 282                | 0.664 |

**Supplementary table S6. B Cell linear epitopes of HTL MEVs. Linear B Cell epitopes predicted by ElliPro (IEDB) from HTL MEVs.**

| HTL Multi-Epitope vaccine model linear epitopes |       |     |                                                                                                                                                     |                    |       |
|-------------------------------------------------|-------|-----|-----------------------------------------------------------------------------------------------------------------------------------------------------|--------------------|-------|
| S.No.                                           | Start | End | Peptide                                                                                                                                             | Number of residues | Score |
| 1                                               | 691   | 810 | INVFAFPFTIYSLGGGGSKTQSLIVNNATNVVGGGGSLIVNNATNVVIK<br>VCGGGGSQSLIVNNATNVVIKGGGGSSLLIVNNATNVVIKVGGGGSTQ<br>SLLIVNNATNVVIHHHHHH                        | 120                | 0.831 |
| 2                                               | 1     | 138 | IVVAVTGYNCPGGKLTALERKKIVGQNNKYRSDLINGKLNKRNNGTYMPR<br>GKNMLELTWDCGLESSAQRWANQCIFGHSPRQQREGVGENVYAYWSS<br>VSVEGLKKTAGTDAGKSWWSKLPKLYENNPSNNMTWKVAGQG | 138                | 0.777 |
| 3                                               | 452   | 468 | VSIWNLDYIINLIGGGG                                                                                                                                   | 17                 | 0.713 |
| 4                                               | 323   | 333 | FVGGGGSESPF                                                                                                                                         | 11                 | 0.69  |
| 5                                               | 474   | 489 | WNLDYIINLIIGGGGS                                                                                                                                    | 16                 | 0.685 |
| 6                                               | 434   | 444 | TVYSHLLLVA                                                                                                                                          | 11                 | 0.679 |
| 7                                               | 543   | 551 | LYGGGGSCF                                                                                                                                           | 9                  | 0.651 |
| 8                                               | 416   | 424 | TIPIQASLP                                                                                                                                           | 9                  | 0.63  |
| 9                                               | 278   | 287 | SAFFGMSGGG                                                                                                                                          | 10                 | 0.608 |
| 10                                              | 351   | 360 | ILASFSASTS                                                                                                                                          | 10                 | 0.597 |
| 11                                              | 496   | 508 | WNLDYIINLIGGGG                                                                                                                                      | 13                 | 0.586 |
| 12                                              | 399   | 404 | PAQYEL                                                                                                                                              | 6                  | 0.572 |
| 13                                              | 378   | 383 | SAPPAQ                                                                                                                                              | 6                  | 0.565 |
| 14                                              | 673   | 684 | FAFPFTIYSLLL                                                                                                                                        | 12                 | 0.556 |
| 15                                              | 515   | 527 | ALITLATCELGGG                                                                                                                                       | 13                 | 0.544 |
| 16                                              | 570   | 573 | LCFL                                                                                                                                                | 4                  | 0.54  |
| 17                                              | 655   | 660 | DDPCPI                                                                                                                                              | 6                  | 0.518 |

**Supplementary table S7. B Cell discontinuous epitopes of HTL MEVs. Discontinuous B Cell epitopes predicted by ElliPro (IEDB) from HTL MEVs.**

| HTL Multi-Epitope vaccine model discontinuous epitopes |                                                                                                                                                                                                                                                                                                                                                                                                                                                                                                                                                                                                                                                                                                                                                                                                                                                                                                                                    |                    |       |  |
|--------------------------------------------------------|------------------------------------------------------------------------------------------------------------------------------------------------------------------------------------------------------------------------------------------------------------------------------------------------------------------------------------------------------------------------------------------------------------------------------------------------------------------------------------------------------------------------------------------------------------------------------------------------------------------------------------------------------------------------------------------------------------------------------------------------------------------------------------------------------------------------------------------------------------------------------------------------------------------------------------|--------------------|-------|--|
| S. No.                                                 | Residues                                                                                                                                                                                                                                                                                                                                                                                                                                                                                                                                                                                                                                                                                                                                                                                                                                                                                                                           | Number of residues | Score |  |
| 1                                                      | C639, P640, I641, D655, D656, P657, C658, P659, I660, H661, F662, F673, A674, F675, P676, F677, T678, I679, Y680, S681, L682, L683, L684, G687, G688, I691, N692, V693, F694, A695, F696, P697, F698, T699, I700, Y701, S702, L703, L704, G705, G706, G707, G708, S709, K710, T711, Q712, S713, L714, L715, I716, V717, N718, N719, A720, T721, N722, V723, V724, G725, G726, G727, G728, S729, L730, L731, I732, V733, N734, N735, A736, T737, N738, V739, V740, I741, K742, V743, C744, G745, G746, G747, G748, S749, Q750, S751, L752, L753, I754, V755, N756, N757, A758, T759, N760, V761, V762, I763, K764, G765, G766, G767, G768, S769, S770, L771, L772, I773, V774, N775, N776, A777, T778, N779, V780, V781, I782, K783, V784, G785, G786, G787, G788, S789, T790, Q791, S792, L793, L794, I795, V796, N797, N798, A799, T800, N801, V802, V803, I804, H805, H806, H807, H808, H809, H810                               | 145                | 0.776 |  |
| 2                                                      | I1, V2, V3, A4, V5, T6, G7, Y8, N9, C10, P11, G12, G13, K14, L15, T16, A17, L18, E19, R20, K21, K22, I23, V24, G25, Q26, N27, N28, K29, Y30, R31, S32, D33, L34, I35, N36, G37, K38, L39, K40, N41, R42, N43, G44, T45, Y46, M47, P48, R49, G50, K51, N52, M53, L54, E55, L56, T57, W58, D59, C60, K61, L62, E63, S64, S65, A66, Q67, R68, W69, A70, N71, Q72, C73, I74, F75, G76, H77, S78, P79, R80, Q81, Q82, R83, E84, G85, V86, G87, E88, N89, V90, Y91, A92, Y93, W94, S95, S96, V97, S98, V99, E100, G101, L102, K103, K104, T105, A106, G107, T108, D109, A110, G111, K112, S113, W114, W115, S116, K117, L118, P119, K120, L121, Y122, E123, N124, N125, P126, S127, N128, N129, M130, T131, W132, K133, V134, A135, G136, Q137, G138, E145, A146, A147, A148, L150, F152, A154, V156, L163, A164, G165, G168, S169                                                                                                       | 151                | 0.748 |  |
| 3                                                      | S278, A279, F280, F281, G282, M283, S284, G285, G286, G287, F303, G304, G305, A322, F323, V324, G325, G326, G327, G328, S329, E330, S331, P332, F333, I350, I351, L352, A353, S354, F355, S356, A357, S358, T359, S360, S378, A379, P380, P381, A382, Q383, P399, A400, Q401, Y402, E403, L404, G405, G406, G407, T416, I417, P418, I419, Q420, A421, S422, L423, P424, T434, V435, Y436, S437, H438, L439, L440, L441, V442, A444, G446, V452, S453, I454, W455, N456, L457, D458, Y459, I460, I461, N462, L463, I464, G465, G466, G467, G468, W474, N475, L476, D477, Y478, I479, I480, N481, L482, I483, I484, G485, G486, G487, G488, S489, I495, W496, N497, L498, D499, Y500, I501, I502, N503, L504, G505, G506, G507, G508, A515, L516, I517, T518, A520, T521, C522, E523, L538, A539, L543, Y544, G545, G546, G547, G548, S549, C550, F551, L570, C571, F572, L573, F596, L597, L598, F599, P615, Y616, V617, V618, D619 | 150                | 0.609 |  |
| 4                                                      | L524, G525, G526, G527, G528                                                                                                                                                                                                                                                                                                                                                                                                                                                                                                                                                                                                                                                                                                                                                                                                                                                                                                       | 5                  | 0.53  |  |

**Supplementary table S8.** Shortlisted high scoring CTL epitopes (MHC-I Binding Predictions). Selected high scoring CTL epitopes and their respective HLA alleles binders predicted by “MHC-I Binding Predictions” IEDB tool. *In-silico* analysis has shown all the selected epitopes to be non-toxic (Non-Toxin) as well as they show significant conservancy and high immunogenicity.

| SARS-CoV-2 CTL epitopes (MHC-I Binding Predictions) |           |             |         |        |                |                  |           |                                        |                 |
|-----------------------------------------------------|-----------|-------------|---------|--------|----------------|------------------|-----------|----------------------------------------|-----------------|
| S.No.                                               | Proteins  | Peptide     | Allele  | Length | Immunogenicity | Conservancy      | Toxicity  | Method used                            | Percentile Rank |
| 1                                                   | E Protein | FLAFVVLL    | A*02:01 | 9      | 0.30188        | 99.59% (480/482) | Non-Toxin | Consensus (ann/comblib_sidney2008/smm) | 0.2             |
| 2                                                   | E Protein | FLAFVVLL    | A*02:03 | 9      | 0.30188        | 99.59% (480/482) | Non-Toxin | Consensus (ann/smm)                    | 0.25            |
| 3                                                   | E Protein | FLAFVVLLV   | A*02:01 | 10     | 0.30526        | 99.59% (480/482) | Non-Toxin | Consensus (ann/smm)                    | 0.15            |
| 4                                                   | E Protein | FLAFVVLLV   | A*02:03 | 10     | 0.30526        | 99.59% (480/482) | Non-Toxin | Consensus (ann/smm)                    | 0.23            |
| 5                                                   | E Protein | LAFVVLLV    | B*51:01 | 9      | 0.2141         | 99.59% (480/482) | Non-Toxin | Consensus (ann/comblib_sidney2008/smm) | 0.2             |
| 6                                                   | E Protein | LVKPSFYVY   | B*15:01 | 9      | -0.11106       | 99.59% (480/482) | Non-Toxin | Consensus (ann/comblib_sidney2008/smm) | 0.2             |
| 7                                                   | E Protein | RVKLNLSR    | A*31:01 | 9      | -0.32968       | 99.59% (480/482) | Non-Toxin | Consensus (ann/smm)                    | 0.16            |
| 8                                                   | E Protein | SLVKPSFYVY  | B*15:01 | 10     | -0.2443        | 99.59% (480/482) | Non-Toxin | Consensus (ann/smm)                    | 0.28            |
| 9                                                   | E Protein | SVLLFLAFV   | A*02:06 | 9      | 0.19022        | 99.59% (480/482) | Non-Toxin | Consensus (ann/smm)                    | 0.33            |
| 10                                                  | E Protein | TLAILTALR   | A*68:01 | 9      | 0.1989         | 99.17% (478/482) | Non-Toxin | Consensus (ann/smm)                    | 0.21            |
| 11                                                  | E Protein | VLLFLAFV    | A*02:01 | 9      | 0.26315        | 99.59% (480/482) | Non-Toxin | Consensus (ann/comblib_sidney2008/smm) | 0.3             |
| 12                                                  | E Protein | VSLVKPSFY   | A*30:02 | 9      | -0.25372       | 99.59% (480/482) | Non-Toxin | Consensus (ann/smm)                    | 0.33            |
| 13                                                  | M Protein | FIASFRLFAR  | A*68:01 | 10     | 0.12185        | 99.79% (476/477) | Non-Toxin | Consensus (ann/smm)                    | 0.12            |
| 14                                                  | M Protein | LIFLWLLWPV  | A*02:06 | 10     | 0.40176        | 98.32% (469/477) | Non-Toxin | Consensus (ann/smm)                    | 0.08            |
| 15                                                  | M Protein | LSYFIASFR   | A*68:01 | 9      | 0.21181        | 97.90% (467/477) | Non-Toxin | Consensus (ann/smm)                    | 0.11            |
| 16                                                  | M Protein | MWLSYFIASF  | A*23:01 | 10     | 0.00197        | 97.69% (466/477) | Non-Toxin | Consensus (ann/smm)                    | 0.11            |
| 17                                                  | M Protein | MWLSYFIASFR | A*68:01 | 11     | 0.03554        | 97.69% (466/477) | Non-Toxin | ann                                    | 0.09            |
| 18                                                  | M Protein | MWLSYFIASFR | A*33:01 | 11     | 0.03554        | 97.69% (466/477) | Non-Toxin | ann                                    | 0.1             |
| 19                                                  | M Protein | QWNLVIGFLF  | A*23:01 | 10     | 0.28076        | 99.16% (473/477) | Non-Toxin | Consensus (ann/smm)                    | 0.12            |
| 20                                                  | M Protein | RFLYIILKIF  | A*23:01 | 10     | 0.11728        | 98.74% (471/477) | Non-Toxin | Consensus (ann/smm)                    | 0.12            |
| 21                                                  | M Protein | RTRSMWSF    | A*32:01 | 8      | -0.25178       | 99.58% (475/477) | Non-Toxin | ann                                    | 0.1             |
| 22                                                  | N Protein | AQFAPSASAF  | B*15:01 | 10     | -0.17446       | 97.59% (486/498) | Non-Toxin | Consensus (ann/smm)                    | 0.16            |
| 23                                                  | N Protein | AQFAPSASAFF | B*15:01 | 11     | -0.11074       | 97.59% (486/498) | Non-Toxin | ann                                    | 0.12            |
| 24                                                  | N Protein | FTALTQHGK   | A*68:01 | 9      | -0.0226        | 99.40% (495/498) | Non-Toxin | Consensus (ann/smm)                    | 0.18            |
| 25                                                  | N Protein | KMKDLSR     | A*31:01 | 8      | -0.22357       | 99.60% (496/498) | Non-Toxin | ann                                    | 0.15            |
| 26                                                  | N Protein | KTFPPTPEK   | A*11:01 | 9      | 0.1306         | 96.99% (483/498) | Non-Toxin | Consensus (ann/smm)                    | 0.11            |
| 27                                                  | N Protein | KTFPPTPEK   | A*30:01 | 9      | 0.1306         | 96.99% (483/498) | Non-Toxin | Consensus (ann/comblib_sidney2008/smm) | 0.2             |
| 28                                                  | N Protein | RQKRTATKAY  | B*15:01 | 10     | -0.06462       | 97.79% (487/498) | Non-Toxin | Consensus (ann/smm)                    | 0.2             |
| 29                                                  | N Protein | SSPDDQIGYY  | A*01:01 | 10     | 0.07924        | 99.40% (495/498) | Non-Toxin | Consensus (ann/smm)                    | 0.2             |
| 30                                                  | ORF-1ab   | ASFYYVWKS   | A*30:02 | 10     | 0.00073        | 99.78% (455/456) | Non-Toxin | Consensus (ann/smm)                    | 0.07            |
| 31                                                  | ORF-1ab   | CLAYYFMFRFR | A*33:01 | 11     | 0.12614        | 100% (456/456)   | Non-Toxin | ann                                    | 0.07            |
| 32                                                  | ORF-1ab   | ETISLAGSY   | A*26:01 | 9      | -0.1653        | 100% (456/456)   | Non-Toxin | Consensus (ann/smm)                    | 0.1             |
| 33                                                  | ORF-1ab   | IPLMYKGLPW  | B*53:01 | 10     | -0.37784       | 100% (456/456)   | Non-Toxin | Consensus (ann/smm)                    | 0.07            |
| 34                                                  | ORF-1ab   | IPLMYKGLPW  | B*53:01 | 10     | -0.37784       | 100% (456/456)   | Non-Toxin | Consensus (ann/smm)                    | 0.07            |
| 35                                                  | ORF-1ab   | KMNYQVNGY   | A*30:02 | 9      | -0.06542       | 100% (456/456)   | Non-Toxin | Consensus (ann/smm)                    | 0.07            |

|    |         |            |         |    |          |                   |           |                                        |      |
|----|---------|------------|---------|----|----------|-------------------|-----------|----------------------------------------|------|
| 36 | ORF-1ab | KMNYQVNGY  | A*30:02 | 9  | -0.06542 | 100% (456/456)    | Non-Toxin | Consensus (ann/smm)                    | 0.07 |
| 37 | ORF-1ab | STNVTIATY  | A*30:02 | 9  | 0.25822  | 99.34% (453/456)  | Non-Toxin | Consensus (ann/smm)                    | 0.09 |
| 38 | ORF-1ab | YAYLRKHFSM | B*08:01 | 10 | -0.13937 | 100% (456/456)    | Non-Toxin | Consensus (ann/smm)                    | 0.07 |
| 39 | ORF3a   | FMRIFTIGTV | A*02:03 | 10 | 0.47908  | 99.37% (478/481)  | Non-Toxin | Consensus (ann/smm)                    | 0.17 |
| 40 | ORF3a   | FTIGTVTLK  | A*68:01 | 9  | 0.18024  | 99.37% (478/481)  | Non-Toxin | Consensus (ann/smm)                    | 0.16 |
| 41 | ORF3a   | HVTFFIYNK  | A*68:01 | 9  | 0.36278  | 99.79% (480/481)  | Non-Toxin | Consensus (ann/smm)                    | 0.16 |
| 42 | ORF3a   | IIMRLWLCWK | A*03:01 | 10 | 0.27346  | 96.67% (465/481)  | Non-Toxin | Consensus (ann/smm)                    | 0.13 |
| 43 | ORF3a   | VEHVTFIY   | B*44:03 | 9  | 0.3766   | 99.58% (479/481)  | Non-Toxin | Consensus (ann/smm)                    | 0.18 |
| 44 | ORF3a   | YFLQSINFVR | A*33:01 | 10 | -0.03483 | 96.88% (466/481)  | Non-Toxin | Consensus (ann/smm)                    | 0.2  |
| 45 | ORF6    | AEILLIIM   | B*40:01 | 8  | 0.25884  | 99.58% (479/481)  | Non-Toxin | Consensus (ann/smm)                    | 0.41 |
| 46 | ORF6    | FQVTIAEIL  | A*02:06 | 9  | 0.38115  | 99.17% (477/481)  | Non-Toxin | Consensus (ann/smm)                    | 0.52 |
| 47 | ORF6    | ILLIIMRTFK | A*03:01 | 10 | 0.2388   | 99.58% (479/481)  | Non-Toxin | Consensus (ann/smm)                    | 0.17 |
| 48 | ORF6    | IMRTFKVSI  | A*32:01 | 9  | -0.09496 | 99.79% (480/481)  | Non-Toxin | Consensus (ann/comblib_sidney2008/smm) | 0.44 |
| 49 | ORF6    | KVSIWNLDY  | A*30:02 | 9  | 0.29343  | 99.58% (479/481)  | Non-Toxin | Consensus (ann/smm)                    | 0.41 |
| 50 | ORF6    | LLIIMRTFK  | A*03:01 | 9  | 0.156    | 99.58% (479/481)  | Non-Toxin | Consensus (ann/smm)                    | 0.36 |
| 51 | ORF6    | LSKSLTENKY | A*30:02 | 10 | -0.24668 | 98.75% (475/481)  | Non-Toxin | Consensus (ann/smm)                    | 0.48 |
| 52 | ORF6    | SIWNLDYII  | A*32:01 | 9  | 0.15011  | 99.58% (479/481)  | Non-Toxin | Consensus (ann/comblib_sidney2008/smm) | 0.2  |
| 53 | ORF6    | VTIAEILLI  | B*58:01 | 9  | 0.28951  | 99.17% (477/481)  | Non-Toxin | Consensus (ann/comblib_sidney2008/smm) | 0.34 |
| 54 | ORF7a   | CVRGTTVLLK | A*03:01 | 10 | 0.14952  | 99.58% (478/480)  | Non-Toxin | Consensus (ann/smm)                    | 0.17 |
| 55 | ORF7a   | EVQELYSPI  | A*26:01 | 9  | -0.09723 | 98.12% (471/480)  | Non-Toxin | Consensus (ann/smm)                    | 0.21 |
| 56 | ORF7a   | EVQELYSPIF | A*26:01 | 10 | -0.03858 | 98.12% (471/480)  | Non-Toxin | Consensus (ann/smm)                    | 0.22 |
| 57 | ORF7a   | FALTCFSTQF | B*53:01 | 10 | -0.09369 | 98.75% (474/480)  | Non-Toxin | Consensus (ann/smm)                    | 0.22 |
| 58 | ORF7a   | FLIVAAIVF  | B*15:01 | 9  | 0.29611  | 98.96% (475/480)  | Non-Toxin | Consensus (ann/comblib_sidney2008/smm) | 0.2  |
| 59 | ORF7a   | FLIVAAIVFI | A*02:01 | 10 | 0.38946  | 98.33% (472/480)  | Non-Toxin | Consensus (ann/smm)                    | 0.21 |
| 60 | ORF7a   | ITLCFTLKRK | A*03:01 | 10 | -0.06825 | 97.92% (470/480)  | Non-Toxin | Consensus (ann/smm)                    | 0.17 |
| 61 | ORF7a   | QELYSPIFLI | B*44:02 | 10 | 0.03838  | 98.33% (472/480)  | Non-Toxin | Consensus (ann/smm)                    | 0.22 |
| 62 | ORF7a   | QELYSPIFLI | B*44:03 | 10 | 0.03838  | 98.33% (472/480)  | Non-Toxin | Consensus (ann/smm)                    | 0.25 |
| 63 | ORF7a   | RSVSPKLF   | B*58:01 | 9  | -0.30783 | 98.33% (472/480)  | Non-Toxin | Consensus (ann/comblib_sidney2008/smm) | 0.2  |
| 64 | ORF7b   | DFYLCFLAF  | A*23:01 | 9  | 0.05884  | 98.31% (232/236)  | Non-Toxin | Consensus (ann/smm)                    | 0.29 |
| 65 | ORF7b   | FLAFLFLVL  | A*02:01 | 10 | 0.23386  | 98.31% (232/236)  | Non-Toxin | Consensus (ann/smm)                    | 0.26 |
| 66 | ORF7b   | FLLFLVLIML | A*02:01 | 10 | 0.14288  | 99.58% (235/236)  | Non-Toxin | Consensus (ann/smm)                    | 0.3  |
| 67 | ORF7b   | FYLCFLAFLL | A*23:01 | 10 | 0.1745   | 98.31% (232/236)  | Non-Toxin | Consensus (ann/smm)                    | 0.13 |
| 68 | ORF7b   | FYLCFLAFLL | A*24:02 | 10 | 0.1745   | 98.31% (232/236)  | Non-Toxin | Consensus (ann/smm)                    | 0.28 |
| 69 | ORF7b   | IELSLIDFY  | B*44:03 | 9  | 0.03153  | 99.58% (235/236)  | Non-Toxin | Consensus (ann/smm)                    | 0.19 |
| 70 | ORF7b   | LVLIMLIIFW | B*53:01 | 10 | 0.25452  | 99.58% (235/236)  | Non-Toxin | Consensus (ann/smm)                    | 0.32 |
| 71 | ORF7b   | MIELSLIDFY | A*01:01 | 10 | 0.06184  | 99.58% (235/236)  | Non-Toxin | Consensus (ann/smm)                    | 0.35 |
| 72 | ORF7b   | MLIIFWFSL  | A*02:01 | 9  | 0.50177  | 99.58% (235/236)  | Non-Toxin | Consensus (ann/comblib_sidney2008/smm) | 0.2  |
| 73 | ORF7b   | SLIDFYLCFL | A*02:01 | 10 | 0.18838  | 98.31% (232/236)  | Non-Toxin | Consensus (ann/smm)                    | 0.14 |
| 74 | ORF7b   | YLCFLAFLL  | A*02:01 | 9  | 0.21865  | 98.31% (232/236)  | Non-Toxin | Consensus (ann/comblib_sidney2008/smm) | 0.3  |
| 75 | ORF8    | CPIHFYSKW  | B*53:01 | 9  | -0.07935 | 99.38% (477/480)  | Non-Toxin | Consensus (ann/comblib_sidney2008/smm) | 0.2  |
| 76 | ORF8    | CPIHFYSKWY | B*53:01 | 10 | -0.02216 | 99.38% (477/480)  | Non-Toxin | Consensus (ann/smm)                    | 0.2  |
| 77 | ORF8    | CSFYEDFLEY | A*01:01 | 10 | 0.31272  | 99.79% (479/480)  | Non-Toxin | Consensus (ann/smm)                    | 0.24 |
| 78 | ORF8    | DFLEYHDVR  | A*33:01 | 9  | 0.16684  | 99.58% (478/480)  | Non-Toxin | Consensus (ann/smm)                    | 0.13 |
| 79 | ORF8    | FTINCQEPK  | A*68:01 | 9  | -0.04683 | 100.00% (480/480) | Non-Toxin | Consensus (ann/smm)                    | 0.18 |
| 80 | ORF8    | GARKSAPLI  | A*30:01 | 9  | -0.34031 | 99.17% (476/480)  | Non-Toxin | Consensus (ann/comblib_sidney2008/smm) | 0.3  |

|     |           |             |         |    |          |                   |           |                                        |      |
|-----|-----------|-------------|---------|----|----------|-------------------|-----------|----------------------------------------|------|
| 81  | ORF8      | GIITVAAF    | B*15:01 | 9  | 0.2148   | 99.17% (476/480)  | Non-Toxin | Consensus (ann/comblib_sidney2008/smm) | 0.3  |
| 82  | ORF8      | GSLVVRCSFY  | A*30:02 | 10 | 0.00657  | 100.00% (480/480) | Non-Toxin | Consensus (ann/smm)                    | 0.24 |
| 83  | ORF8      | IQYIDIGNY   | A*30:02 | 9  | 0.30442  | 99.38% (477/480)  | Non-Toxin | Consensus (ann/smm)                    | 0.12 |
| 84  | ORF8      | LGIITVAAF   | B*15:01 | 10 | 0.34746  | 99.17% (476/480)  | Non-Toxin | Consensus (ann/smm)                    | 0.31 |
| 85  | ORF8      | LQSCTQHQPY  | B*15:01 | 10 | -0.25674 | 96.04% (461/480)  | Non-Toxin | Consensus (ann/smm)                    | 0.17 |
| 86  | ORF8      | NYTVSCLPF   | A*23:01 | 9  | -0.17355 | 51.46% (247/480)  | Non-Toxin | Consensus (ann/smm)                    | 0.23 |
| 87  | ORF8      | QSCTQHQPY   | A*01:01 | 9  | -0.16503 | 96.04% (461/480)  | Non-Toxin | Consensus (ann/smm)                    | 0.28 |
| 88  | ORF10     | FAFPFTIYSL  | A*02:06 | 10 | 0.20414  | 99.79% (478/479)  | Non-Toxin | Consensus (ann/smm)                    | 0.48 |
| 89  | ORF10     | FPFTIYSL    | B*51:01 | 8  | 0.06356  | 100.00% (479/479) | Non-Toxin | Consensus (ann/smm)                    | 0.39 |
| 90  | ORF10     | FPFTIYSL    | B*51:01 | 9  | 0.05708  | 100.00% (479/479) | Non-Toxin | Consensus (ann/comblib_sidney2008/smm) | 0.3  |
| 91  | ORF10     | FPFTIYSL    | B*53:01 | 10 | 0.03149  | 100.00% (479/479) | Non-Toxin | Consensus (ann/smm)                    | 0.13 |
| 92  | ORF10     | FPFTIYSL    | B*51:01 | 10 | 0.03149  | 100.00% (479/479) | Non-Toxin | Consensus (ann/smm)                    | 0.14 |
| 93  | ORF10     | FTIYSL      | A*68:01 | 10 | -0.18372 | 100.00% (479/479) | Non-Toxin | Consensus (ann/smm)                    | 0.12 |
| 94  | ORF10     | FTIYSL      | A*33:01 | 10 | -0.18372 | 100.00% (479/479) | Non-Toxin | Consensus (ann/smm)                    | 0.35 |
| 95  | ORF10     | MGYINVFAPPF | A*23:01 | 11 | 0.40977  | 99.37% (476/479)  | Non-Toxin | Consensus (ann/smm)                    | 0.41 |
| 96  | ORF10     | TIYSL       | A*68:01 | 9  | -0.22977 | 100.00% (479/479) | Non-Toxin | Consensus (ann/smm)                    | 0.47 |
| 97  | ORF10     | YINVFAPPF   | B*53:01 | 9  | 0.28259  | 99.37% (476/479)  | Non-Toxin | Consensus (ann/comblib_sidney2008/smm) | 0.35 |
| 98  | ORF10     | YINVFAPPF   | A*32:01 | 9  | 0.28259  | 99.37% (476/479)  | Non-Toxin | Consensus (ann/comblib_sidney2008/smm) | 0.4  |
| 99  | S Protein | FVFLVLLPLV  | A*02:06 | 10 | 0.02996  | 98.94% (467/472)  | Non-Toxin | Consensus (ann/smm)                    | 0.1  |
| 100 | S Protein | GNYNYLYRFR  | A*33:01 | 11 | 0.08205  | 98.52% (465/472)  | Non-Toxin | ann                                    | 0.11 |
| 101 | S Protein | KSFTVEKGIY  | A*30:02 | 10 | 0.11812  | 99.36% (469/472)  | Non-Toxin | Consensus (ann/smm)                    | 0.11 |

**Supplementary table S9.** Shortlisted high scoring CTL epitopes (MHC-I Processing Predictions). Selected high scoring CTL epitopes and their respective HLA alleles binders predicted by “MHC-I Processing Predictions” IEDB tool. The screening gives detailed and combined scoring “Total score” for Proteasomal cleavage/TAP transport/MHC class I combined. *In-silico* analysis have shown all the selected epitopes to be non-toxic (Non-Toxin) as well as they show significant conservancy with high immunogenicity.

| SARS-CoV-2 CTL epitopes (MHC-I Processing Predictions) |           |         |                |            |                |                  |           |                  |           |           |                  |             |              |
|--------------------------------------------------------|-----------|---------|----------------|------------|----------------|------------------|-----------|------------------|-----------|-----------|------------------|-------------|--------------|
| S.No.                                                  | Proteins  | Allele  | Peptide Length | Peptide    | Immunogenicity | Conservancy      | Toxicity  | Proteasome Score | TAP Score | MHC Score | Processing Score | Total Score | MHC IC50[nM] |
| 1                                                      | E Protein | B*15:01 | 10             | SLVKPSFYVY | -0.2443        | 99.59% (480/482) | Non-Toxin | 1.51             | 1.36      | -1.39     | 2.86             | 1.47        | 24.6         |
| 2                                                      | E Protein | B*15:01 | 9              | LVKPSFYVY  | -0.11106       | 99.59% (480/482) | Non-Toxin | 1.51             | 1.35      | -1.42     | 2.86             | 1.44        | 26.3         |
| 3                                                      | E Protein | A*30:02 | 9              | LVKPSFYVY  | -0.11106       | 99.59% (480/482) | Non-Toxin | 1.51             | 1.35      | -1.61     | 2.86             | 1.25        | 40.4         |
| 4                                                      | E Protein | A*02:01 | 9              | FLAFVWFLL  | 0.30188        | 99.59% (480/482) | Non-Toxin | 1.45             | 0.41      | -0.81     | 1.86             | 1.05        | 6.5          |
| 5                                                      | E Protein | B*15:01 | 9              | LTALRLCAY  | 0.01886        | 99.17% (478/482) | Non-Toxin | 1.42             | 1.27      | -1.69     | 2.69             | 1           | 49.5         |
| 6                                                      | M Protein | A*30:02 | 9              | ATSRTL     | -0.11604       | 98.95% (472/477) | Non-Toxin | 1.26             | 1.34      | -1.12     | 2.6              | 1.48        | 13.3         |
| 7                                                      | M Protein | A*11:01 | 9              | ATSRTL     | -0.11604       | 98.95% (472/477) | Non-Toxin | 1.26             | 1.34      | -1.52     | 2.6              | 1.08        | 32.9         |
| 8                                                      | M Protein | B*08:01 | 10             | FARTSMWSF  | -0.12986       | 99.58% (475/477) | Non-Toxin | 1.41             | 1.12      | -1.34     | 2.53             | 1.19        | 22.1         |
| 9                                                      | M Protein | A*02:01 | 10             | FLWLLWPVTL | 0.31272        | 98.53% (470/477) | Non-Toxin | 1.85             | 0.46      | -1.16     | 2.31             | 1.16        | 14.3         |
| 10                                                     | M Protein | A*68:01 | 9              | LSYFIASFR  | 0.21181        | 97.90% (467/477) | Non-Toxin | 0.84             | 0.72      | -0.46     | 1.56             | 1.1         | 2.9          |
| 11                                                     | M Protein | A*23:01 | 11             | LSYFIASFR  | 0.2706         | 97.90% (467/477) | Non-Toxin | 1.25             | 1.18      | -1.36     | 2.43             | 1.07        | 23           |

|    |           |         |    |             |          |                  |           |      |      |       |      |      |      |
|----|-----------|---------|----|-------------|----------|------------------|-----------|------|------|-------|------|------|------|
| 12 | M Protein | A*23:01 | 10 | MWLSYFIASF  | 0.00197  | 97.69% (466/477) | Non-Toxin | 1.38 | 1.26 | -0.91 | 2.63 | 1.73 | 8.1  |
| 13 | M Protein | A*24:02 | 10 | MWLSYFIASF  | 0.00197  | 97.69% (466/477) | Non-Toxin | 1.38 | 1.26 | -1.27 | 2.63 | 1.36 | 18.7 |
| 14 | M Protein | B*15:01 | 10 | MWLSYFIASF  | 0.00197  | 97.69% (466/477) | Non-Toxin | 1.38 | 1.26 | -1.33 | 2.63 | 1.3  | 21.6 |
| 15 | M Protein | A*23:01 | 10 | RFLYIHKLIF  | 0.11728  | 98.74% (471/477) | Non-Toxin | 1.25 | 1.35 | -1.33 | 2.6  | 1.27 | 21.3 |
| 16 | M Protein | A*30:01 | 8  | RTRSMWSF    | -0.25178 | 99.58% (475/477) | Non-Toxin | 1.41 | 1.28 | -1.51 | 2.69 | 1.18 | 32.7 |
| 17 | M Protein | A*30:02 | 9  | SGFAAYSRY   | 0.00261  | 98.32% (469/477) | Non-Toxin | 1.53 | 1.17 | -1.4  | 2.69 | 1.3  | 25   |
| 18 | M Protein | B*15:01 | 10 | SQRVAGDSGF  | 0.0305   | 98.53% (470/477) | Non-Toxin | 1.33 | 1.24 | -1.35 | 2.58 | 1.23 | 22.4 |
| 19 | M Protein | A*23:01 | 9  | SYFIASFRL   | 0.18333  | 98.74% (471/477) | Non-Toxin | 1.45 | 0.62 | -0.99 | 2.08 | 1.09 | 9.8  |
| 20 | M Protein | B*35:01 | 9  | VATSRTLSTY  | -0.17295 | 98.95% (472/477) | Non-Toxin | 1.34 | 1.31 | -1.38 | 2.65 | 1.27 | 23.9 |
| 21 | M Protein | A*30:02 | 9  | YSRYRIGNY   | 0.21358  | 98.53% (470/477) | Non-Toxin | 1.36 | 1.37 | -1.61 | 2.73 | 1.12 | 40.6 |
| 22 | N Protein | B*15:01 | 10 | AQFAPSASAF  | -0.17446 | 97.59% (486/498) | Non-Toxin | 1.23 | 1.25 | -0.7  | 2.48 | 1.78 | 5    |
| 23 | N Protein | B*15:01 | 11 | AQFAPSASAFF | -0.11074 | 97.59% (486/498) | Non-Toxin | 1.3  | 1.25 | -1.46 | 2.55 | 1.08 | 29   |
| 24 | N Protein | A*30:02 | 10 | KDLSPRWYFY  | 0.14332  | 99.60% (496/498) | Non-Toxin | 1.58 | 1.21 | -1.68 | 2.79 | 1.1  | 48.3 |
| 25 | N Protein | A*30:02 | 10 | KMKDLSPRWY  | -0.05692 | 99.60% (496/498) | Non-Toxin | 1.31 | 1.35 | -1.56 | 2.66 | 1.1  | 36.2 |
| 26 | N Protein | A*68:02 | 9  | NTASWFTAL   | 0.22775  | 99.60% (496/498) | Non-Toxin | 1.42 | 0.49 | -0.79 | 1.91 | 1.12 | 6.2  |
| 27 | N Protein | B*15:01 | 10 | RQKRTATKAY  | -0.06462 | 97.79% (487/498) | Non-Toxin | 1.51 | 1.34 | -1.55 | 2.85 | 1.3  | 35.5 |
| 28 | N Protein | A*01:01 | 10 | SSPDDQIGYY  | 0.07924  | 99.40% (495/498) | Non-Toxin | 1.24 | 1.36 | -1.16 | 2.6  | 1.45 | 14.3 |
| 29 | ORF1ab    | A*01:01 | 10 | ACTDDNALAY  | 0.10055  | 99.78% (455/456) | Non-Toxin | 1.49 | 1.33 | -0.82 | 2.82 | 2    | 6.6  |
| 30 | ORF1ab    | A*01:01 | 9  | CTDDNALAY   | 0.07355  | 99.78% (455/456) | Non-Toxin | 1.49 | 1.23 | -0.45 | 2.72 | 2.27 | 2.8  |
| 31 | ORF1ab    | A*26:01 | 9  | ETISLAGSY   | -0.1653  | 100% (456/456)   | Non-Toxin | 1.4  | 1.21 | -0.53 | 2.61 | 2.08 | 3.4  |
| 32 | ORF1ab    | B*35:01 | 9  | FAVDAAKAY   | -0.04849 | 98.90% (451/456) | Non-Toxin | 1.73 | 1.35 | -0.46 | 3.08 | 2.62 | 2.9  |
| 33 | ORF1ab    | B*15:01 | 9  | ILMTARTVY   | 0.12576  | 100% (456/456)   | Non-Toxin | 1.65 | 1.34 | -1.1  | 2.99 | 1.89 | 12.5 |
| 34 | ORF1ab    | B*15:01 | 10 | LILMTARTVY  | 0.0012   | 100% (456/456)   | Non-Toxin | 1.65 | 1.36 | -1.23 | 3.01 | 1.78 | 16.9 |
| 35 | ORF1ab    | B*15:01 | 10 | LMSNLGMPY   | -0.30933 | 99.56% (454/456) | Non-Toxin | 1.55 | 1.34 | -1    | 2.9  | 1.89 | 10.1 |
| 36 | ORF1ab    | B*35:01 | 9  | LPSLATVAY   | 0.06748  | 98.02% (447/456) | Non-Toxin | 1.47 | 1.15 | -0.34 | 2.62 | 2.28 | 2.2  |
| 37 | ORF1ab    | A*32:01 | 9  | RMYIFFASF   | 0.29328  | 99.12% (452/456) | Non-Toxin | 1.32 | 1.36 | -0.82 | 2.68 | 1.86 | 6.6  |
| 38 | ORF1ab    | A*30:02 | 10 | RMYIFFASFY  | 0.32633  | 99.12% (452/456) | Non-Toxin | 1.28 | 1.53 | -0.97 | 2.81 | 1.83 | 9.4  |
| 39 | ORF1ab    | A*03:01 | 10 | RMYIFFASFY  | 0.32633  | 99.12% (452/456) | Non-Toxin | 1.28 | 1.53 | -1    | 2.81 | 1.8  | 10.1 |
| 40 | ORF1ab    | B*44:03 | 9  | SEFSSLPY    | -0.40603 | 99.34% (453/456) | Non-Toxin | 1.49 | 1.35 | -1.03 | 2.84 | 1.82 | 10.6 |
| 41 | ORF1ab    | B*15:01 | 9  | VMYMGTLSTY  | -0.21438 | 97.58% (445/456) | Non-Toxin | 1.3  | 1.5  | -0.8  | 2.79 | 1.99 | 6.3  |
| 42 | ORF1ab    | A*03:01 | 9  | VMYMGTLSTY  | -0.21438 | 97.58% (445/456) | Non-Toxin | 1.3  | 1.5  | -0.98 | 2.79 | 1.82 | 9.5  |
| 43 | ORF3a     | B*44:03 | 11 | AGLEAPFLYLY | 0.21841  | 96.67% (465/481) | Non-Toxin | 1.51 | 1.29 | -1.63 | 2.8  | 1.17 | 42.9 |
| 44 | ORF3a     | A*23:01 | 10 | LVYFLQSINF  | -0.05419 | 96.88% (466/481) | Non-Toxin | 1.3  | 1.31 | -1.39 | 2.61 | 1.23 | 24.3 |
| 45 | ORF6      | A*30:02 | 9  | KVSIWNLDY   | 0.29343  | 99.58% (479/481) | Non-Toxin | 1.21 | 1.33 | -1.46 | 2.54 | 1.08 | 28.8 |
| 46 | ORF7a     | B*35:01 | 9  | CPDGVKHVY   | -0.07008 | 98.54% (473/480) | Non-Toxin | 1.43 | 1.11 | -1.34 | 2.54 | 1.2  | 22   |
| 47 | ORF7b     | A*02:01 | 9  | IIFWFSLEL   | 0.2683   | 99.58% (235/236) | Non-Toxin | 1.65 | 0.55 | -1.2  | 2.21 | 1.01 | 15.7 |
| 48 | ORF7b     | A*02:01 | 10 | SLIDFYLCFL  | 0.18838  | 98.31% (232/236) | Non-Toxin | 1.7  | 0.5  | -0.74 | 2.2  | 1.46 | 5.5  |
| 49 | ORF7b     | A*02:03 | 10 | SLIDFYLCFL  | 0.18838  | 98.31% (232/236) | Non-Toxin | 1.7  | 0.5  | -0.79 | 2.2  | 1.41 | 6.2  |
| 50 | ORF7b     | A*02:06 | 10 | SLIDFYLCFL  | 0.18838  | 98.31% (232/236) | Non-Toxin | 1.7  | 0.5  | -0.93 | 2.2  | 1.27 | 8.6  |
| 51 | ORF8      | B*15:01 | 9  | GIITTVAAF   | 0.2148   | 99.17% (476/480) | Non-Toxin | 1.27 | 1.13 | -1.26 | 2.4  | 1.14 | 18.1 |
| 52 | ORF8      | A*33:01 | 9  | HFYSKWYIR   | -0.09452 | 99.38% (477/480) | Non-Toxin | 1.08 | 0.76 | -0.68 | 1.84 | 1.16 | 4.8  |
| 53 | ORF8      | A*31:01 | 9  | HFYSKWYIR   | -0.09452 | 99.38% (477/480) | Non-Toxin | 1.08 | 0.76 | -0.79 | 1.84 | 1.05 | 6.2  |
| 54 | ORF8      | B*15:01 | 10 | LGIITTVAAF  | 0.34746  | 99.17% (476/480) | Non-Toxin | 1.27 | 0.97 | -1.1  | 2.24 | 1.14 | 12.7 |
| 55 | ORF10     | A*68:01 | 10 | NVFAFPFTIY  | 0.40129  | 99.58% (477/479) | Non-Toxin | 1.47 | 1.4  | -1.84 | 2.86 | 1.02 | 69.7 |



|    |           |         |    |             |          |                   |           |      |      |       |      |      |      |
|----|-----------|---------|----|-------------|----------|-------------------|-----------|------|------|-------|------|------|------|
| 56 | S Protein | B*35:01 | 9  | CVADYSVLY   | -0.09595 | 100.00% (472/472) | Non-Toxin | 1.51 | 1.38 | -1.39 | 2.89 | 1.5  | 24.4 |
| 57 | S Protein | B*35:01 | 9  | FAMQMAYRF   | -0.28061 | 100.00% (472/472) | Non-Toxin | 1.45 | 1.05 | -0.8  | 2.5  | 1.7  | 6.3  |
| 58 | S Protein | B*58:01 | 10 | KRSFIEDLLF  | 0.29624  | 99.36% (469/472)  | Non-Toxin | 1.23 | 1.26 | -1.11 | 2.49 | 1.37 | 12.9 |
| 59 | S Protein | A*23:01 | 10 | KWPWYIWLGF  | 0.56424  | 99.58% (470/472)  | Non-Toxin | 1.26 | 1.25 | -1.04 | 2.51 | 1.47 | 11   |
| 60 | S Protein | B*35:01 | 11 | LQIPFAMQMAY | -0.22124 | 100.00% (472/472) | Non-Toxin | 1.42 | 1.4  | -1.25 | 2.82 | 1.57 | 17.8 |
| 61 | S Protein | A*01:01 | 9  | LTDEMAIQY   | 0.02757  | 99.58% (470/472)  | Non-Toxin | 1.21 | 1.21 | -0.72 | 2.42 | 1.71 | 5.2  |
| 62 | S Protein | B*35:01 | 10 | QIPFAMQMAY  | -0.25308 | 100.00% (472/472) | Non-Toxin | 1.42 | 1.35 | -1.16 | 2.77 | 1.61 | 14.5 |
| 63 | S Protein | A*30:02 | 9  | RISNCVADY   | -0.02787 | 100.00% (472/472) | Non-Toxin | 1.16 | 1.47 | -1.26 | 2.63 | 1.37 | 18.2 |
| 64 | S Protein | B*58:01 | 9  | RSFIEDLLF   | 0.27446  | 99.58% (470/472)  | Non-Toxin | 1.23 | 1.32 | -0.72 | 2.54 | 1.82 | 5.3  |
| 65 | S Protein | B*15:01 | 10 | RVYSTGSNVF  | -0.23394 | 100.00% (472/472) | Non-Toxin | 1.51 | 1.32 | -1.02 | 2.83 | 1.81 | 10.5 |
| 66 | S Protein | B*35:01 | 9  | SANNCTFEY   | 0.13273  | 98.94% (467/472)  | Non-Toxin | 1.18 | 1.3  | -1.11 | 2.48 | 1.37 | 12.8 |
| 67 | S Protein | A*30:02 | 10 | YTNSFTRGVY  | 0.08467  | 99.58% (470/472)  | Non-Toxin | 1.36 | 1.28 | -1.26 | 2.64 | 1.38 | 18.2 |

**Supplementary table S10.** Shortlisted high scoring HTL epitopes (MHC-II Binding Predictions). Selected high “Percentile rank” HTL epitopes with their respective HLA class II alleles binders predicted by the “MHC-II Binding Predictions” tool of IEDB are listed. *In-silico* analysis has shown all the selected epitopes to be non-toxic (Non-Toxin) as well as they show significant conservancy.

| SARS-CoV-2 HTL epitopes (MHC-II Binding Predictions) |           |                       |                 |                  |           |                               |                 |
|------------------------------------------------------|-----------|-----------------------|-----------------|------------------|-----------|-------------------------------|-----------------|
| S.No                                                 | Proteins  | Allele                | Peptide         | Conservancy      | Toxicity  | Method used                   | Percentile Rank |
| 1                                                    | E Protein | DPA1*03:01/DPB1*04:02 | FLAFVVFLLVTLAIL | 99.59% (480/482) | Non-Toxin | Consensus (comb.lib./simm/nn) | 0.06            |
| 2                                                    | E Protein | DPA1*03:01/DPB1*04:02 | LFLAFVVFLLVTLAI | 99.59% (480/482) | Non-Toxin | Consensus (comb.lib./simm/nn) | 0.03            |
| 3                                                    | E Protein | DPA1*01:03/DPB1*02:01 | LFLAFVVFLLVTLAI | 99.59% (480/482) | Non-Toxin | Consensus (comb.lib./simm/nn) | 0.04            |
| 4                                                    | E Protein | DPA1*01/DPB1*04:01    | LFLAFVVFLLVTLAI | 99.59% (480/482) | Non-Toxin | Consensus (comb.lib./simm)    | 0.08            |
| 5                                                    | E Protein | DPA1*02:01/DPB1*01:01 | LFLAFVVFLLVTLAI | 99.59% (480/482) | Non-Toxin | Consensus (comb.lib./simm/nn) | 0.1             |
| 6                                                    | E Protein | DPA1*01:03/DPB1*02:01 | NSVLLFLAFVVFLLV | 99.59% (480/482) | Non-Toxin | Consensus (comb.lib./simm/nn) | 0.04            |
| 7                                                    | E Protein | DPA1*03:01/DPB1*04:02 | NSVLLFLAFVVFLLV | 99.59% (480/482) | Non-Toxin | Consensus (comb.lib./simm/nn) | 0.06            |
| 8                                                    | E Protein | DPA1*01/DPB1*04:01    | NSVLLFLAFVVFLLV | 99.59% (480/482) | Non-Toxin | Consensus (comb.lib./simm)    | 0.07            |
| 9                                                    | E Protein | DPA1*02:01/DPB1*01:01 | NSVLLFLAFVVFLLV | 99.59% (480/482) | Non-Toxin | Consensus (comb.lib./simm/nn) | 0.1             |
| 10                                                   | E Protein | DPA1*02:01/DPB1*01:01 | VNSVLLFLAFVVFLL | 99.59% (480/482) | Non-Toxin | Consensus (comb.lib./simm/nn) | 0.1             |
| 11                                                   | M Protein | DQA1*01:01/DQB1*05:01 | IKLIFLWLLWPVTLA | 98.11% (468/477) | Non-Toxin | Consensus (comb.lib./simm/nn) | 0.07            |
| 12                                                   | M Protein | DQA1*01:01/DQB1*05:01 | KLIFLWLLWPVTLAC | 98.11% (468/477) | Non-Toxin | Consensus (comb.lib./simm/nn) | 0.11            |
| 13                                                   | M Protein | DRB1*09:01            | RTLSYYKLGASQRVA | 99.16% (473/477) | Non-Toxin | Consensus (comb.lib./simm/nn) | 0.06            |
| 14                                                   | M Protein | DRB1*01:01            | RTLSYYKLGASQRVA | 99.16% (473/477) | Non-Toxin | Consensus (comb.lib./simm/nn) | 0.67            |
| 15                                                   | M Protein | DRB1*09:01            | SRTLSYYKLGASQRV | 99.16% (473/477) | Non-Toxin | Consensus (comb.lib./simm/nn) | 0.07            |
| 16                                                   | M Protein | DRB1*09:01            | SYYKLGASQRVAGDS | 98.74% (471/477) | Non-Toxin | Consensus (comb.lib./simm/nn) | 0.48            |
| 17                                                   | M Protein | DRB1*09:01            | TLSYYKLGASQRVAG | 98.95% (472/477) | Non-Toxin | Consensus (comb.lib./simm/nn) | 0.07            |
| 18                                                   | M Protein | DRB1*01:01            | TLSYYKLGASQRVAG | 98.95% (472/477) | Non-Toxin | Consensus (comb.lib./simm/nn) | 0.67            |
| 19                                                   | M Protein | DPA1*01:03/DPB1*02:01 | VGLMWLSYFIASFRL | 97.48% (465/477) | Non-Toxin | Consensus (comb.lib./simm/nn) | 0.07            |
| 20                                                   | N Protein | DQA1*01:02/DQB1*06:02 | ANNAIVLQLPQGTT  | 97.59% (486/498) | Non-Toxin | Consensus (comb.lib./simm/nn) | 0.2             |
| 21                                                   | N Protein | DRB1*11:01            | DQIGYYRRATRIRG  | 99.40% (495/498) | Non-Toxin | Consensus (simm/nn/stumiolo)  | 0.42            |
| 22                                                   | N Protein | DRB5*01:01            | DQIGYYRRATRIRG  | 99.40% (495/498) | Non-Toxin | Consensus (simm/nn/stumiolo)  | 0.58            |

|    |           |                       |                  |                  |           |                              |      |
|----|-----------|-----------------------|------------------|------------------|-----------|------------------------------|------|
| 23 | N Protein | DQA1*01:02/DQB1*06:02 | GTRNPANNAIVLQL   | 97.59% (486/498) | Non-Toxin | Consensus (comb.lib./smm/nn) | 0.05 |
| 24 | N Protein | DRB1*07:01            | GTWLTYTGAIKLDDK  | 97.59% (486/498) | Non-Toxin | Consensus (comb.lib./smm/nn) | 0.58 |
| 25 | N Protein | DRB1*11:01            | GYRRATRRIRGGDG   | 99.40% (495/498) | Non-Toxin | Consensus (smm/nn/sturniolo) | 0.42 |
| 26 | N Protein | DRB1*11:01            | IGYRRATRRIRGGD   | 99.40% (495/498) | Non-Toxin | Consensus (smm/nn/sturniolo) | 0.42 |
| 27 | N Protein | DQA1*01:02/DQB1*06:02 | NNAIVLQLPQGTTL   | 97.59% (486/498) | Non-Toxin | Consensus (comb.lib./smm/nn) | 0.42 |
| 28 | N Protein | DQA1*01:02/DQB1*06:02 | NPANNAIVLQLPQG   | 97.59% (486/498) | Non-Toxin | Consensus (comb.lib./smm/nn) | 0.03 |
| 29 | N Protein | DQA1*01:02/DQB1*06:02 | PANNAIVLQLPQGT   | 97.59% (486/498) | Non-Toxin | Consensus (comb.lib./smm/nn) | 0.04 |
| 30 | N Protein | DRB1*09:01            | QIAQFAPSASAFFGM  | 97.39% (485/498) | Non-Toxin | Consensus (comb.lib./smm/nn) | 0.01 |
| 31 | N Protein | DRB1*11:01            | QIGYRRATRRIRGG   | 99.40% (495/498) | Non-Toxin | Consensus (smm/nn/sturniolo) | 0.39 |
| 32 | N Protein | DRB5*01:01            | QIGYRRATRRIRGG   | 99.40% (495/498) | Non-Toxin | Consensus (smm/nn/sturniolo) | 0.58 |
| 33 | N Protein | DQA1*01:02/DQB1*06:02 | RNPANNAIVLQLPQ   | 97.59% (486/498) | Non-Toxin | Consensus (comb.lib./smm/nn) | 0.04 |
| 34 | N Protein | DRB1*07:01            | SGTWLTYTGAIKLDD  | 97.39% (485/498) | Non-Toxin | Consensus (comb.lib./smm/nn) | 0.58 |
| 35 | N Protein | DRB1*07:01            | TPSGTWLTYTGAIKL  | 97.39% (485/498) | Non-Toxin | Consensus (comb.lib./smm/nn) | 0.58 |
| 36 | N Protein | DQA1*01:02/DQB1*06:02 | TRNPANNAIVLQLP   | 97.39% (485/498) | Non-Toxin | Consensus (comb.lib./smm/nn) | 0.04 |
| 37 | N Protein | DRB1*07:01            | TWLTYTGAIKLDDKD  | 97.59% (486/498) | Non-Toxin | Consensus (comb.lib./smm/nn) | 0.58 |
| 38 | ORF1ab    | DPA1*01:03/DPB1*02:01 | WFLAYILTRFFVYL   | 100% (456/456)   | Non-Toxin | Consensus (comb.lib./smm/nn) | 0.01 |
| 39 | ORF1ab    | DPA1*01:03/DPB1*02:01 | FLAYILTRFFVYLG   | 100% (456/456)   | Non-Toxin | Consensus (comb.lib./smm/nn) | 0.01 |
| 40 | ORF1ab    | DPA1*01:03/DPB1*02:01 | LAYILTRFFVYVGL   | 100% (456/456)   | Non-Toxin | Consensus (comb.lib./smm/nn) | 0.01 |
| 41 | ORF1ab    | DPA1*01:03/DPB1*02:01 | AYILTRFFVYVGLA   | 100% (456/456)   | Non-Toxin | Consensus (comb.lib./smm/nn) | 0.01 |
| 42 | ORF1ab    | DRB1*15:01            | AMPNMLRIMASLVLA  | 100% (456/456)   | Non-Toxin | Consensus (smm/nn/sturniolo) | 0.01 |
| 43 | ORF1ab    | DRB1*15:01            | MPNMLRIMASLVLAR  | 100% (456/456)   | Non-Toxin | Consensus (smm/nn/sturniolo) | 0.01 |
| 44 | ORF1ab    | DRB1*15:01            | PNMLRIMASLVLARK  | 100% (456/456)   | Non-Toxin | Consensus (smm/nn/sturniolo) | 0.01 |
| 45 | ORF1ab    | DRB1*15:01            | NMLRIMASLVLARKH  | 100% (456/456)   | Non-Toxin | Consensus (smm/nn/sturniolo) | 0.01 |
| 46 | ORF1ab    | DRB3*02:02            | FAWWTAFVTVNVNASS | 98.46% (449/456) | Non-Toxin | NetMHCIIpan                  | 0.01 |
| 47 | ORF1ab    | DPA1*01:03/DPB1*02:01 | AAIMQLFFSYFAVHF  | 100% (456/456)   | Non-Toxin | Consensus (comb.lib./smm/nn) | 0.05 |
| 48 | ORF1ab    | DQA1*01:02/DQB1*06:02 | AFASEAARVRSIFS   | 99.56% (454/456) | Non-Toxin | Consensus (comb.lib./smm/nn) | 0.08 |
| 49 | ORF1ab    | DPA1*01:03/DPB1*02:01 | AIMQLFFSYFAVHFI  | 100% (456/456)   | Non-Toxin | Consensus (comb.lib./smm/nn) | 0.05 |
| 50 | ORF1ab    | DRB3*02:02            | ANYIFWRNTNPIQLS  | 98.90% (451/456) | Non-Toxin | NetMHCIIpan                  | 0.05 |
| 51 | ORF1ab    | DQA1*05:01/DQB1*03:01 | ASIVAGGIVAVVTC   | 100% (456/456)   | Non-Toxin | Consensus (comb.lib./smm/nn) | 0.03 |
| 52 | ORF1ab    | DRB3*02:02            | AWWTAFVTVNVNASSS | 98.46% (449/456) | Non-Toxin | NetMHCIIpan                  | 0.01 |
| 53 | ORF1ab    | DQA1*05:01/DQB1*03:01 | DISASIVAGGIVAVI  | 100% (456/456)   | Non-Toxin | Consensus (comb.lib./smm/nn) | 0.03 |
| 54 | ORF1ab    | DPA1*03:01/DPB1*04:02 | EETKFLTENLLLYID  | 99.78% (455/456) | Non-Toxin | Consensus (comb.lib./smm/nn) | 0.03 |
| 55 | ORF1ab    | DQA1*05:01/DQB1*02:01 | EIDFLELAMDEFIER  | 99.12% (452/456) | Non-Toxin | Consensus (comb.lib./smm/nn) | 0.04 |
| 56 | ORF1ab    | DPA1*03:01/DPB1*04:02 | ETKFLTENLLLYIDI  | 99.78% (455/456) | Non-Toxin | Consensus (comb.lib./smm/nn) | 0.03 |
| 57 | ORF1ab    | DQA1*01:01/DQB1*05:01 | FISNSWLMWLIINLV  | 100% (456/456)   | Non-Toxin | Consensus (comb.lib./smm/nn) | 0.05 |
| 58 | ORF1ab    | DRB1*07:01            | FSAVGNICYTPSKLI  | 99.56% (454/456) | Non-Toxin | Consensus (comb.lib./smm/nn) | 0.06 |
| 59 | ORF1ab    | DRB1*07:01            | FTPLVPFWITAIYII  | 100% (456/456)   | Non-Toxin | Consensus (comb.lib./smm/nn) | 0.03 |
| 60 | ORF1ab    | DQA1*01:01/DQB1*05:01 | HFISNSWLMWLIINL  | 100% (456/456)   | Non-Toxin | Consensus (comb.lib./smm/nn) | 0.05 |
| 61 | ORF1ab    | DQA1*05:01/DQB1*02:01 | IDFLELAMDEFIERY  | 99.34% (453/456) | Non-Toxin | Consensus (comb.lib./smm/nn) | 0.05 |
| 62 | ORF1ab    | DQA1*05:01/DQB1*03:01 | ISASIVAGGIVAVV   | 100% (456/456)   | Non-Toxin | Consensus (comb.lib./smm/nn) | 0.03 |
| 63 | ORF1ab    | DQA1*01:01/DQB1*05:01 | ISNSWLMWLIINLVQ  | 100% (456/456)   | Non-Toxin | Consensus (comb.lib./smm/nn) | 0.07 |
| 64 | ORF1ab    | DPA1*03:01/DPB1*04:02 | KLINIIWFLLLSVC   | 97.80% (446/456) | Non-Toxin | Consensus (comb.lib./smm/nn) | 0.09 |
| 65 | ORF1ab    | DPA1*02:01/DPB1*05:01 | KVTLVFLFVAIFYL   | 99.78% (455/456) | Non-Toxin | Consensus (comb.lib./smm/nn) | 0.04 |

|     |        |                       |                  |                  |           |                              |      |
|-----|--------|-----------------------|------------------|------------------|-----------|------------------------------|------|
| 66  | ORF1ab | DPA1*01:03/DPB1*02:01 | LAAIMQLFFSYFAVH  | 100% (456/456)   | Non-Toxin | Consensus (comb.lib./smm/nn) | 0.07 |
| 67  | ORF1ab | DPA1*03:01/DPB1*04:02 | LEETKFLTENLLLYI  | 99.78% (455/456) | Non-Toxin | Consensus (comb.lib./smm/nn) | 0.03 |
| 68  | ORF1ab | DPA1*03:01/DPB1*04:02 | LINIIWFLLLSVCL   | 97.80% (446/456) | Non-Toxin | Consensus (comb.lib./smm/nn) | 0.09 |
| 69  | ORF1ab | DRB1*07:01            | LVPFWITIAYIICIS  | 100% (456/456)   | Non-Toxin | Consensus (comb.lib./smm/nn) | 0.03 |
| 70  | ORF1ab | DQA1*05:01/DQB1*02:01 | MEIDFLELAMDEFIE  | 99.12% (452/456) | Non-Toxin | Consensus (comb.lib./smm/nn) | 0.04 |
| 71  | ORF1ab | DPA1*02:01/DPB1*14:01 | MNLKYAISAKNRART  | 99.78% (455/456) | Non-Toxin | NetMHCIIpan                  | 0.08 |
| 72  | ORF1ab | DPA1*01:03/DPB1*02:01 | MQLFFSYFAVHFISN  | 100% (456/456)   | Non-Toxin | Consensus (comb.lib./smm/nn) | 0.05 |
| 73  | ORF1ab | DPA1*01:03/DPB1*02:01 | MYIFFASFYYVWKS   | 99.12% (452/456) | Non-Toxin | Consensus (comb.lib./smm/nn) | 0.04 |
| 74  | ORF1ab | DRB1*11:01            | NEFYAYLRKHFSMMI  | 100% (456/456)   | Non-Toxin | Consensus (smm/nn/stumiolo)  | 0.02 |
| 75  | ORF1ab | DRB3*02:02            | NYIFWRNTNPIQLSS  | 98.90% (451/456) | Non-Toxin | NetMHCIIpan                  | 0.04 |
| 76  | ORF1ab | DRB1*07:01            | PLVPFWITIAYIICI  | 100% (456/456)   | Non-Toxin | Consensus (comb.lib./smm/nn) | 0.02 |
| 77  | ORF1ab | DQA1*05:01/DQB1*02:01 | QMEIDFLELAMDEFI  | 99.12% (452/456) | Non-Toxin | Consensus (comb.lib./smm/nn) | 0.03 |
| 78  | ORF1ab | DPA1*02:01/DPB1*14:01 | QMNLYAISAKNRAR   | 99.78% (455/456) | Non-Toxin | NetMHCIIpan                  | 0.07 |
| 79  | ORF1ab | DRB1*01:01            | QQESPFVMMSAPPAQ  | 99.78% (455/456) | Non-Toxin | Consensus (comb.lib./smm/nn) | 0.1  |
| 80  | ORF1ab | DQA1*01:01/DQB1*05:01 | QSTQWSLFFFLYENA  | 92.10% (420/456) | Non-Toxin | Consensus (comb.lib./smm/nn) | 0.1  |
| 81  | ORF1ab | DPA1*01:03/DPB1*02:01 | QWSLFFFLYENAF    | 92.10% (420/456) | Non-Toxin | Consensus (comb.lib./smm/nn) | 0.04 |
| 82  | ORF1ab | DPA1*01:03/DPB1*02:01 | RMYIFFASFYYVWKS  | 99.12% (452/456) | Non-Toxin | Consensus (comb.lib./smm/nn) | 0.04 |
| 83  | ORF1ab | DQA1*05:01/DQB1*03:01 | SASIVAGGIVAIVVT  | 100% (456/456)   | Non-Toxin | Consensus (comb.lib./smm/nn) | 0.03 |
| 84  | ORF1ab | DRB1*07:01            | SAVGNICYTPSKLIE  | 99.56% (454/456) | Non-Toxin | Consensus (comb.lib./smm/nn) | 0.09 |
| 85  | ORF1ab | DQA1*05:01/DQB1*03:01 | SIVAGGIVAIVVTCL  | 100% (456/456)   | Non-Toxin | Consensus (comb.lib./smm/nn) | 0.03 |
| 86  | ORF1ab | DPA1*03:01/DPB1*04:02 | SKLINIIWFLLLSV   | 97.80% (446/456) | Non-Toxin | Consensus (comb.lib./smm/nn) | 0.09 |
| 87  | ORF1ab | DQA1*01:01/DQB1*05:01 | SNSWLMWLIIINLVQM | 100% (456/456)   | Non-Toxin | Consensus (comb.lib./smm/nn) | 0.07 |
| 88  | ORF1ab | DQA1*05:01/DQB1*02:01 | SQMEIDFLELAMDEF  | 99.12% (452/456) | Non-Toxin | Consensus (comb.lib./smm/nn) | 0.05 |
| 89  | ORF1ab | DPA1*01:03/DPB1*02:01 | STQWSLFFFLYENAF  | 92.10% (420/456) | Non-Toxin | Consensus (comb.lib./smm/nn) | 0.05 |
| 90  | ORF1ab | DQA1*01:01/DQB1*05:01 | STQWSLFFFLYENAF  | 92.10% (420/456) | Non-Toxin | Consensus (comb.lib./smm/nn) | 0.1  |
| 91  | ORF1ab | DPA1*03:01/DPB1*04:02 | TKFLTENLLLYIDIN  | 99.78% (455/456) | Non-Toxin | Consensus (comb.lib./smm/nn) | 0.05 |
| 92  | ORF1ab | DPA1*03:01/DPB1*04:02 | TLEETKFLTENLLLY  | 99.78% (455/456) | Non-Toxin | Consensus (comb.lib./smm/nn) | 0.05 |
| 93  | ORF1ab | DRB1*07:01            | TPLVPFWITIAYIIC  | 100% (456/456)   | Non-Toxin | Consensus (comb.lib./smm/nn) | 0.03 |
| 94  | ORF1ab | DPA1*01:03/DPB1*02:01 | TQWSLFFFLYENAF   | 92.10% (420/456) | Non-Toxin | Consensus (comb.lib./smm/nn) | 0.04 |
| 95  | ORF1ab | DQA1*01:01/DQB1*05:01 | TQWSLFFFLYENAF   | 92.10% (420/456) | Non-Toxin | Consensus (comb.lib./smm/nn) | 0.09 |
| 96  | ORF1ab | DRB1*11:01            | VNEFYAYLRKHFSMM  | 100% (456/456)   | Non-Toxin | Consensus (smm/nn/stumiolo)  | 0.05 |
| 97  | ORF1ab | DRB1*01:01            | VQQESPFVMMSAPPA  | 99.78% (455/456) | Non-Toxin | Consensus (comb.lib./smm/nn) | 0.1  |
| 98  | ORF1ab | DQA1*01:02/DQB1*06:02 | YAFASEAARVRSIF   | 99.78% (455/456) | Non-Toxin | Consensus (comb.lib./smm/nn) | 0.08 |
| 99  | ORF1ab | DPA1*01:03/DPB1*02:01 | YIFFASFYYVWKS    | 99.56% (454/456) | Non-Toxin | Consensus (comb.lib./smm/nn) | 0.05 |
| 100 | ORF1ab | DRB3*02:02            | YIFWRNTNPIQLSS   | 98.90% (451/456) | Non-Toxin | NetMHCIIpan                  | 0.05 |
| 101 | ORF1ab | DPA1*01:03/DPB1*02:01 | YILFTRFFVYVGLAA  | 100% (456/456)   | Non-Toxin | Consensus (comb.lib./smm/nn) | 0.08 |
| 102 | ORF3a  | DPA1*01/DPB1*04:01    | APFLYLALVYFLQS   | 96.88% (466/481) | Non-Toxin | Consensus (comb.lib./smm)    | 0.12 |
| 103 | ORF3a  | DPA1*02:01/DPB1*14:01 | DFVRATATIPIQASL  | 99.37% (478/481) | Non-Toxin | NetMHCIIpan                  | 0.12 |
| 104 | ORF3a  | DPA1*01:03/DPB1*02:01 | DTGVEHVTFYIYNKI  | 99.37% (478/481) | Non-Toxin | Consensus (comb.lib./smm/nn) | 1.1  |
| 105 | ORF3a  | DPA1*02:01/DPB1*05:01 | DTGVEHVTFYIYNKI  | 99.37% (478/481) | Non-Toxin | Consensus (comb.lib./smm/nn) | 1.6  |
| 106 | ORF3a  | DRB1*04:05            | FFIYNKIVDEPEEHV  | 99.58% (479/481) | Non-Toxin | Consensus (smm/nn/stumiolo)  | 0.94 |
| 107 | ORF3a  | DPA1*01/DPB1*04:01    | FLYLYALVYFLQSIN  | 96.67% (465/481) | Non-Toxin | Consensus (comb.lib./smm)    | 0.12 |
| 108 | ORF3a  | DPA1*01:03/DPB1*02:01 | GVEHVTFYIYNKIVD  | 99.37% (478/481) | Non-Toxin | Consensus (comb.lib./smm/nn) | 1.2  |

|     |       |                       |                  |                  |           |                              |      |
|-----|-------|-----------------------|------------------|------------------|-----------|------------------------------|------|
| 109 | ORF3a | DRB1*04:05            | HVTFYIYNKIVDEPE  | 99.58% (479/481) | Non-Toxin | Consensus (smm/nn/sturniolo) | 0.84 |
| 110 | ORF3a | DPA1*01/DPB1*04:01    | PFLYLYALVYFLQSI  | 96.67% (465/481) | Non-Toxin | Consensus (comb.lib./smm)    | 0.12 |
| 111 | ORF3a | DRB1*04:05            | TFFIYNKIVDEPEEH  | 99.58% (479/481) | Non-Toxin | Consensus (smm/nn/sturniolo) | 0.81 |
| 112 | ORF3a | DPA1*01:03/DPB1*02:01 | TGVEHVTFYIYNKIV  | 99.37% (478/481) | Non-Toxin | Consensus (comb.lib./smm/nn) | 0.93 |
| 113 | ORF3a | DPA1*02:01/DPB1*05:01 | TGVEHVTFYIYNKIV  | 99.37% (478/481) | Non-Toxin | Consensus (comb.lib./smm/nn) | 1.4  |
| 114 | ORF3a | DRB1*04:05            | VTFYIYNKIVDEPEE  | 99.58% (479/481) | Non-Toxin | Consensus (smm/nn/sturniolo) | 0.81 |
| 115 | ORF3a | DPA1*01/DPB1*04:01    | YLYALVYFLQSINRV  | 96.46% (464/481) | Non-Toxin | Consensus (comb.lib./smm)    | 0.14 |
| 116 | ORF6  | DRB1*15:01            | EILLIMRTFKVSIW   | 99.58% (479/481) | Non-Toxin | Consensus (smm/nn/sturniolo) | 0.1  |
| 117 | ORF6  | DRB1*15:01            | ILLIMRTFKVSIWN   | 99.38% (478/481) | Non-Toxin | Consensus (smm/nn/sturniolo) | 0.1  |
| 118 | ORF6  | DQA1*01:01/DQB1*05:01 | VSIWNLDYIINLIK   | 99.38% (478/481) | Non-Toxin | Consensus (comb.lib./smm/nn) | 0.05 |
| 119 | ORF7a | DRB1*01:01            | KILLFLALITLATCE  | 99.58% (478/480) | Non-Toxin | Consensus (comb.lib./smm/nn) | 0.16 |
| 120 | ORF7b | DRB4*01:01            | AFLFLVLIIMLIIFW  | 99.58% (235/236) | Non-Toxin | Consensus (comb.lib./smm/nn) | 0.14 |
| 121 | ORF7b | DPA1*03:01/DPB1*04:02 | DFYLCFLAFLFLVL   | 98.31% (232/236) | Non-Toxin | Consensus (comb.lib./smm/nn) | 0.03 |
| 122 | ORF7b | DPA1*01:03/DPB1*02:01 | DFYLCFLAFLFLVL   | 98.31% (232/236) | Non-Toxin | Consensus (comb.lib./smm/nn) | 0.08 |
| 123 | ORF7b | DPA1*01/DPB1*04:01    | DFYLCFLAFLFLVL   | 98.31% (232/236) | Non-Toxin | Consensus (comb.lib./smm)    | 0.09 |
| 124 | ORF7b | DPA1*03:01/DPB1*04:02 | FLAFLFLVLIIMLII  | 97.88% (231/236) | Non-Toxin | Consensus (comb.lib./smm/nn) | 0.06 |
| 125 | ORF7b | DRB4*01:01            | FLAFLFLVLIIMLII  | 97.88% (231/236) | Non-Toxin | Consensus (comb.lib./smm/nn) | 0.14 |
| 126 | ORF7b | DRB4*01:01            | FLLFLVLIIMLIIFW  | 99.58% (235/236) | Non-Toxin | Consensus (comb.lib./smm/nn) | 0.19 |
| 127 | ORF7b | DPA1*03:01/DPB1*04:02 | FYLCFLAFLFLVLI   | 97.88% (231/236) | Non-Toxin | Consensus (comb.lib./smm/nn) | 0.03 |
| 128 | ORF7b | DPA1*01:03/DPB1*02:01 | FYLCFLAFLFLVLI   | 97.88% (231/236) | Non-Toxin | Consensus (comb.lib./smm/nn) | 0.06 |
| 129 | ORF7b | DPA1*01/DPB1*04:01    | FYLCFLAFLFLVLI   | 97.88% (231/236) | Non-Toxin | Consensus (comb.lib./smm)    | 0.09 |
| 130 | ORF7b | DPA1*01:03/DPB1*02:01 | IDFYLCFLAFLFLV   | 98.31% (232/236) | Non-Toxin | Consensus (comb.lib./smm/nn) | 0.06 |
| 131 | ORF7b | DPA1*03:01/DPB1*04:02 | IDFYLCFLAFLFLV   | 98.31% (232/236) | Non-Toxin | Consensus (comb.lib./smm/nn) | 0.16 |
| 132 | ORF7b | DPA1*03:01/DPB1*04:02 | LAFLLFLVLIIMLIIF | 99.58% (235/236) | Non-Toxin | Consensus (comb.lib./smm/nn) | 0.08 |
| 133 | ORF7b | DRB4*01:01            | LAFLLFLVLIIMLIIF | 99.58% (235/236) | Non-Toxin | Consensus (comb.lib./smm/nn) | 0.12 |
| 134 | ORF7b | DPA1*01:03/DPB1*02:01 | LIDFYLCFLAFLFL   | 98.31% (232/236) | Non-Toxin | Consensus (comb.lib./smm/nn) | 0.05 |
| 135 | ORF7b | DPA1*01:03/DPB1*02:01 | LSLIDFYLCFLAFL   | 98.31% (232/236) | Non-Toxin | Consensus (comb.lib./smm/nn) | 0.15 |
| 136 | ORF7b | DQA1*01:01/DQB1*05:01 | LVLIMLIIFWFSLEL  | 99.58% (235/236) | Non-Toxin | Consensus (comb.lib./smm/nn) | 0.14 |
| 137 | ORF7b | DPA1*01:03/DPB1*02:01 | SLIDFYLCFLAFLF   | 98.31% (232/236) | Non-Toxin | Consensus (comb.lib./smm/nn) | 0.07 |
| 138 | ORF8  | DQA1*01:01/DQB1*05:01 | LVVRCSEFYEDFLEYH | 99.58% (478/480) | Non-Toxin | Consensus (comb.lib./smm/nn) | 0.45 |
| 139 | ORF8  | DRB3*01:01            | QHQPYYVDDPCPIHF  | 99.17% (476/480) | Non-Toxin | Consensus (comb.lib./smm/nn) | 0.08 |
| 140 | ORF8  | DRB3*01:01            | TQHQPYYVDDPCPIH  | 99.17% (476/480) | Non-Toxin | Consensus (comb.lib./smm/nn) | 0.08 |
| 141 | ORF10 | DPA1*01/DPB1*04:01    | FAFPFTIYSLLLCRM  | 99.79% (478/479) | Non-Toxin | Consensus (comb.lib./smm)    | 0.56 |
| 142 | ORF10 | DPA1*02:01/DPB1*01:01 | FAFPFTIYSLLLCRM  | 99.79% (478/479) | Non-Toxin | Consensus (comb.lib./smm/nn) | 1.1  |
| 143 | ORF10 | DPA1*03:01/DPB1*04:02 | FAFPFTIYSLLLCRM  | 99.79% (478/479) | Non-Toxin | Consensus (comb.lib./smm/nn) | 1.1  |
| 144 | ORF10 | DPA1*01:03/DPB1*02:01 | INVFAFPFTIYSLLL  | 99.37% (476/479) | Non-Toxin | Consensus (comb.lib./smm/nn) | 0.29 |
| 145 | ORF10 | DPA1*01/DPB1*04:01    | INVFAFPFTIYSLLL  | 99.37% (476/479) | Non-Toxin | Consensus (comb.lib./smm)    | 0.46 |
| 146 | ORF10 | DPA1*02:01/DPB1*01:01 | INVFAFPFTIYSLLL  | 99.37% (476/479) | Non-Toxin | Consensus (comb.lib./smm/nn) | 0.72 |
| 147 | ORF10 | DPA1*01:03/DPB1*02:01 | NVFAFPFTIYSLLLC  | 99.58% (477/479) | Non-Toxin | Consensus (comb.lib./smm/nn) | 0.4  |
| 148 | ORF10 | DPA1*01/DPB1*04:01    | NVFAFPFTIYSLLLC  | 99.58% (477/479) | Non-Toxin | Consensus (comb.lib./smm)    | 0.56 |
| 149 | ORF10 | DPA1*02:01/DPB1*01:01 | NVFAFPFTIYSLLLC  | 99.58% (477/479) | Non-Toxin | Consensus (comb.lib./smm/nn) | 0.69 |
| 150 | ORF10 | DPA1*01/DPB1*04:01    | VFAFPFTIYSLLLCR  | 99.58% (477/479) | Non-Toxin | Consensus (comb.lib./smm)    | 0.56 |
| 151 | ORF10 | DPA1*02:01/DPB1*01:01 | VFAFPFTIYSLLLCR  | 99.58% (477/479) | Non-Toxin | Consensus (comb.lib./smm/nn) | 0.66 |

|     |           |                       |                  |                   |           |                               |      |
|-----|-----------|-----------------------|------------------|-------------------|-----------|-------------------------------|------|
| 152 | ORF10     | DPA1*01:03/DPB1*02:01 | VFAFPFTIYSLLLCR  | 99.58% (477/479)  | Non-Toxin | Consensus (comb.lib./simm/nn) | 0.71 |
| 153 | ORF10     | DPA1*03:01/DPB1*04:02 | VFAFPFTIYSLLLCR  | 99.58% (477/479)  | Non-Toxin | Consensus (comb.lib./simm/nn) | 1.1  |
| 154 | S protein | DRB3*01:01            | ADSFVIRGDEVRQIA  | 99.79% (471/472)  | Non-Toxin | Consensus (comb.lib./simm/nn) | 0.49 |
| 155 | S protein | DRB1*07:01            | AIPTNFTISVTTEIL  | 100.00% (472/472) | Non-Toxin | Consensus (comb.lib./simm/nn) | 0.4  |
| 156 | S protein | DRB3*01:01            | DSFVIRGDEVRQIAP  | 99.79% (471/472)  | Non-Toxin | Consensus (comb.lib./simm/nn) | 0.51 |
| 157 | S protein | DRB3*02:02            | EGVFSVNGTHWVFVTQ | 99.36% (469/472)  | Non-Toxin | NetMHCIIpan                   | 0.21 |
| 158 | S protein | DRB5*01:01            | FVFKNIDGYFKIYSK  | 98.09% (463/472)  | Non-Toxin | Consensus (simm/nn/sturniolo) | 0.17 |
| 159 | S protein | DRB1*11:01            | GNYNYLYRLFRKSNL  | 98.52% (465/472)  | Non-Toxin | Consensus (simm/nn/sturniolo) | 0.22 |
| 160 | S protein | DRB1*07:01            | IAIPTNFTISVTTEI  | 100.00% (472/472) | Non-Toxin | Consensus (comb.lib./simm/nn) | 0.47 |
| 161 | S protein | DRB5*01:01            | INITRFQTLALHRS   | 99.36% (469/472)  | Non-Toxin | Consensus (simm/nn/sturniolo) | 0.32 |
| 162 | S protein | DRB5*01:01            | ITRFQTLALHRSYL   | 99.36% (469/472)  | Non-Toxin | Consensus (simm/nn/sturniolo) | 0.26 |
| 163 | S protein | DPA1*02:01/DPB1*14:01 | ITRFQTLALHRSYL   | 99.36% (469/472)  | Non-Toxin | NetMHCIIpan                   | 0.43 |
| 164 | S protein | DRB1*13:02            | LIVNNATNVVIVKVCE | 99.36% (469/472)  | Non-Toxin | Consensus (simm/nn/sturniolo) | 0.03 |
| 165 | S protein | DRB1*01:01            | LSFELLHAPATVCGP  | 98.09% (463/472)  | Non-Toxin | Consensus (comb.lib./simm/nn) | 0.03 |
| 166 | S protein | DRB5*01:01            | NITRFQTLALHRSY   | 99.36% (469/472)  | Non-Toxin | Consensus (simm/nn/sturniolo) | 0.32 |
| 167 | S protein | DPA1*02:01/DPB1*14:01 | NITRFQTLALHRSY   | 99.36% (469/472)  | Non-Toxin | NetMHCIIpan                   | 0.45 |
| 168 | S protein | DRB1*07:01            | PTNFTISVTTEILPV  | 100.00% (472/472) | Non-Toxin | Consensus (comb.lib./simm/nn) | 0.51 |
| 169 | S protein | DPA1*02:01/DPB1*14:01 | QLIRAAEIRASANLA  | 99.36% (469/472)  | Non-Toxin | NetMHCIIpan                   | 0.31 |
| 170 | S protein | DPA1*02:01/DPB1*14:01 | QLIRAAEIRASANL   | 99.36% (469/472)  | Non-Toxin | NetMHCIIpan                   | 0.2  |
| 171 | S protein | DRB5*01:01            | REFVFKNIDGYFKIY  | 97.88% (462/472)  | Non-Toxin | Consensus (simm/nn/sturniolo) | 0.17 |
| 172 | S protein | DRB3*02:02            | REGVFSVNGTHWVFVT | 99.58% (470/472)  | Non-Toxin | NetMHCIIpan                   | 0.2  |
| 173 | S protein | DRB1*01:01            | SFELLHAPATVCGPK  | 98.09% (463/472)  | Non-Toxin | Consensus (comb.lib./simm/nn) | 0.09 |
| 174 | S protein | DRB3*01:01            | SFVIRGDEVRQIAPG  | 99.79% (471/472)  | Non-Toxin | Consensus (comb.lib./simm/nn) | 0.51 |
| 175 | S protein | DRB1*13:02            | SKTQSLIVNNATNV   | 100.00% (472/472) | Non-Toxin | Consensus (simm/nn/sturniolo) | 0.03 |
| 176 | S protein | DRB1*01:01            | VLSFELLHAPATVCG  | 98.09% (463/472)  | Non-Toxin | Consensus (comb.lib./simm/nn) | 0.03 |
| 177 | S protein | DRB1*01:01            | VVLSFELLHAPATVC  | 98.09% (463/472)  | Non-Toxin | Consensus (comb.lib./simm/nn) | 0.03 |
| 178 | S protein | DRB1*01:01            | VVLSFELLHAPATV   | 98.09% (463/472)  | Non-Toxin | Consensus (comb.lib./simm/nn) | 0.09 |
| 179 | S protein | DRB3*01:01            | YADSFVIRGDEVRQI  | 99.79% (471/472)  | Non-Toxin | Consensus (comb.lib./simm/nn) | 0.49 |
| 180 | S protein | DQA1*05:01/DQB1*03:01 | YIWLGIAGLIAIVM   | 99.58% (470/472)  | Non-Toxin | Consensus (comb.lib./simm/nn) | 0.51 |

**Supplementary table S11.** Shortlisted B Cell epitopes (BepiPred Linear B Cell Prediction). B cell linear epitopes with length of 4 to 20 amino acids, predicted by the “BepiPred Linear B Cell Prediction” IEDB tool, from eleven SARS-CoV-2 proteins, are listed here. *In-silico* analysis has shown all the selected epitopes to be non-toxic (Non-Toxin) as well as they show significant amino acid sequence conservancy.

| SARS-CoV-2 B Cell epitopes (BepiPred Linear Epitope Prediction) |           |                     |                  |           |        |
|-----------------------------------------------------------------|-----------|---------------------|------------------|-----------|--------|
| S.No.                                                           | Proteins  | Peptide             | Conservancy      | Toxicity  | Length |
| 1                                                               | E protein | SEET                | 99.59% (480/482) | Non-Toxin | 4      |
| 2                                                               | E protein | YVYSRVKNLNSSSRVP    | 99.38% (479/482) | Non-Toxin | 15     |
| 3                                                               | M protein | PLLESE              | 99.16% (473/477) | Non-Toxin | 6      |
| 4                                                               | M protein | KLGAQRVAGDS         | 98.74% (471/477) | Non-Toxin | 12     |
| 5                                                               | M protein | NGTITVEELKKLLEQW    | 98.53% (470/477) | Non-Toxin | 16     |
| 6                                                               | M protein | YRIGNYKLNTHSSSSDNIA | 98.53% (470/477) | Non-Toxin | 20     |
| 7                                                               | N protein | DPNFKD              | 97.19% (484/498) | Non-Toxin | 6      |
| 8                                                               | N protein | AGLPYGANK           | 99.40% (495/498) | Non-Toxin | 9      |
| 9                                                               | N protein | NGPQNQRNAPRI        | 96.18% (479/498) | Non-Toxin | 12     |
| 10                                                              | N protein | SKQLQQSMSSADS       | 97.59% (486/498) | Non-Toxin | 13     |
| 11                                                              | ORF1ab    | IQYG                | 99.78% (455/456) | Non-Toxin | 4      |
| 12                                                              | ORF1ab    | YLKH                | 100% (456/456)   | Non-Toxin | 4      |
| 13                                                              | ORF1ab    | RKVP                | 100% (456/456)   | Non-Toxin | 4      |
| 14                                                              | ORF1ab    | YQCG                | 100% (456/456)   | Non-Toxin | 4      |
| 15                                                              | ORF1ab    | ELSR                | 100% (456/456)   | Non-Toxin | 4      |
| 16                                                              | ORF1ab    | TFCA                | 99.78% (455/456) | Non-Toxin | 4      |
| 17                                                              | ORF1ab    | GKIV                | 100% (456/456)   | Non-Toxin | 4      |
| 18                                                              | ORF1ab    | EGNC                | 100% (456/456)   | Non-Toxin | 4      |
| 19                                                              | ORF1ab    | LPYP                | 100% (456/456)   | Non-Toxin | 4      |
| 20                                                              | ORF1ab    | SLRC                | 100% (456/456)   | Non-Toxin | 4      |
| 21                                                              | ORF1ab    | KVQI                | 100% (456/456)   | Non-Toxin | 4      |
| 22                                                              | ORF1ab    | HDIG                | 100% (456/456)   | Non-Toxin | 4      |
| 23                                                              | ORF1ab    | WNAD                | 98.90% (451/456) | Non-Toxin | 4      |
| 24                                                              | ORF1ab    | EIPVA               | 99.56% (454/456) | Non-Toxin | 5      |
| 25                                                              | ORF1ab    | KGEDI               | 99.78% (455/456) | Non-Toxin | 5      |
| 26                                                              | ORF1ab    | NLYDK               | 100% (456/456)   | Non-Toxin | 5      |
| 27                                                              | ORF1ab    | KFNPP               | 98.68% (450/456) | Non-Toxin | 5      |
| 28                                                              | ORF1ab    | GQQQT               | 98.46% (449/456) | Non-Toxin | 5      |
| 29                                                              | ORF1ab    | KFADD               | 99.34% (453/456) | Non-Toxin | 5      |
| 30                                                              | ORF1ab    | AAVNS               | 100% (456/456)   | Non-Toxin | 5      |
| 31                                                              | ORF1ab    | SKCEE               | 99.12% (452/456) | Non-Toxin | 5      |
| 32                                                              | ORF1ab    | IEYTD               | 100% (456/456)   | Non-Toxin | 5      |
| 33                                                              | ORF1ab    | IQPIG               | 100% (456/456)   | Non-Toxin | 5      |
| 34                                                              | ORF1ab    | NSGSD               | 100% (456/456)   | Non-Toxin | 5      |
| 35                                                              | ORF1ab    | EFTPF               | 100% (456/456)   | Non-Toxin | 5      |

|    |        |         |                  |           |   |
|----|--------|---------|------------------|-----------|---|
| 36 | ORF1ab | LLAKD   | 100% (456/456)   | Non-Toxin | 5 |
| 37 | ORF1ab | EEMLD   | 100% (456/456)   | Non-Toxin | 5 |
| 38 | ORF1ab | RSEDK   | 100% (456/456)   | Non-Toxin | 5 |
| 39 | ORF1ab | TGHML   | 100% (456/456)   | Non-Toxin | 5 |
| 40 | ORF1ab | AHSCN   | 99.78% (455/456) | Non-Toxin | 5 |
| 41 | ORF1ab | QTGSS   | 99.56% (454/456) | Non-Toxin | 5 |
| 42 | ORF1ab | LPVLQV  | 98.90% (451/456) | Non-Toxin | 6 |
| 43 | ORF1ab | FGDSVE  | 99.34% (453/456) | Non-Toxin | 6 |
| 44 | ORF1ab | ARTAPH  | 99.78% (455/456) | Non-Toxin | 6 |
| 45 | ORF1ab | AGKASC  | 100% (456/456)   | Non-Toxin | 6 |
| 46 | ORF1ab | DFIDTK  | 99.78% (455/456) | Non-Toxin | 6 |
| 47 | ORF1ab | QYELKH  | 99.78% (455/456) | Non-Toxin | 6 |
| 48 | ORF1ab | FPDLNG  | 99.12% (452/456) | Non-Toxin | 6 |
| 49 | ORF1ab | SLDTYP  | 100% (456/456)   | Non-Toxin | 6 |
| 50 | ORF1ab | SSFKWD  | 99.34% (453/456) | Non-Toxin | 6 |
| 51 | ORF1ab | KRNRAT  | 99.78% (455/456) | Non-Toxin | 6 |
| 52 | ORF1ab | KGFKL   | 100% (456/456)   | Non-Toxin | 6 |
| 53 | ORF1ab | AQVAKS  | 100% (456/456)   | Non-Toxin | 6 |
| 54 | ORF1ab | VESSSK  | 99.34% (453/456) | Non-Toxin | 6 |
| 55 | ORF1ab | LYDKLQ  | 100% (456/456)   | Non-Toxin | 6 |
| 56 | ORF1ab | ENK TTL | 100% (456/456)   | Non-Toxin | 6 |
| 57 | ORF1ab | DKGVAP  | 100% (456/456)   | Non-Toxin | 6 |
| 58 | ORF1ab | ATNGPLK | 100% (456/456)   | Non-Toxin | 7 |
| 59 | ORF1ab | NKVENMT | 99.78% (455/456) | Non-Toxin | 7 |
| 60 | ORF1ab | TRQVVNV | 100% (456/456)   | Non-Toxin | 7 |
| 61 | ORF1ab | EVGFVVP | 100% (456/456)   | Non-Toxin | 7 |
| 62 | ORF1ab | DASGKPV | 100% (456/456)   | Non-Toxin | 7 |
| 63 | ORF1ab | DYYRSLP | 99.34% (453/456) | Non-Toxin | 7 |
| 64 | ORF1ab | GVSFSTF | 100% (456/456)   | Non-Toxin | 7 |
| 65 | ORF1ab | MAFPSGK | 99.56% (454/456) | Non-Toxin | 7 |
| 66 | ORF1ab | SQGLLPP | 99.56% (454/456) | Non-Toxin | 7 |
| 67 | ORF1ab | VQSKMSD | 99.78% (455/456) | Non-Toxin | 7 |
| 68 | ORF1ab | AVDINKL | 99.12% (452/456) | Non-Toxin | 7 |
| 69 | ORF1ab | DRDAAMQ | 99.12% (452/456) | Non-Toxin | 7 |
| 70 | ORF1ab | FPKSDGT | 100% (456/456)   | Non-Toxin | 7 |
| 71 | ORF1ab | HPNPKGF | 100% (456/456)   | Non-Toxin | 7 |
| 72 | ORF1ab | GNKIADK | 99.56% (454/456) | Non-Toxin | 7 |
| 73 | ORF1ab | YTPHTVL | 99.78% (455/456) | Non-Toxin | 7 |
| 74 | ORF1ab | FEKGDYG | 99.78% (455/456) | Non-Toxin | 7 |
| 75 | ORF1ab | VDSSQGS | 100% (456/456)   | Non-Toxin | 7 |
| 76 | ORF1ab | MYKGLPW | 100% (456/456)   | Non-Toxin | 7 |
| 77 | ORF1ab | IIGDELK | 99.78% (455/456) | Non-Toxin | 7 |
| 78 | ORF1ab | QAWQPGV | 99.78% (455/456) | Non-Toxin | 7 |

|     |        |             |                  |           |    |
|-----|--------|-------------|------------------|-----------|----|
| 79  | ORF1ab | KPREQID     | 98.46% (449/456) | Non-Toxin | 7  |
| 80  | ORF1ab | VPGFNEKT    | 99.12% (452/456) | Non-Toxin | 8  |
| 81  | ORF1ab | RELNGGAY    | 100% (456/456)   | Non-Toxin | 8  |
| 82  | ORF1ab | FTLKGAP     | 99.78% (455/456) | Non-Toxin | 8  |
| 83  | ORF1ab | KTVGELGD    | 98.68% (450/456) | Non-Toxin | 8  |
| 84  | ORF1ab | NVPMKLLK    | 99.34% (453/456) | Non-Toxin | 8  |
| 85  | ORF1ab | GNATEVPA    | 100% (456/456)   | Non-Toxin | 8  |
| 86  | ORF1ab | SGGQPITN    | 100% (456/456)   | Non-Toxin | 8  |
| 87  | ORF1ab | EIIKSQDL    | 100% (456/456)   | Non-Toxin | 8  |
| 88  | ORF1ab | YTVELGTEV   | 100% (456/456)   | Non-Toxin | 9  |
| 89  | ORF1ab | IPTKKAGGT   | 100% (456/456)   | Non-Toxin | 9  |
| 90  | ORF1ab | GLNGYVVEE   | 98.68% (450/456) | Non-Toxin | 9  |
| 91  | ORF1ab | YFYTSKTTV   | 100% (456/456)   | Non-Toxin | 9  |
| 92  | ORF1ab | MSMTYGQQF   | 99.78% (455/456) | Non-Toxin | 9  |
| 93  | ORF1ab | AKNVSLDNV   | 99.78% (455/456) | Non-Toxin | 9  |
| 94  | ORF1ab | GGVTRDIAS   | 100% (456/456)   | Non-Toxin | 9  |
| 95  | ORF1ab | VNLHSSRLS   | 100% (456/456)   | Non-Toxin | 9  |
| 96  | ORF1ab | RNRDVTDF    | 100% (456/456)   | Non-Toxin | 9  |
| 97  | ORF1ab | LTKHPNQEY   | 100% (456/456)   | Non-Toxin | 9  |
| 98  | ORF1ab | TEETFKLSY   | 98.90% (451/456) | Non-Toxin | 9  |
| 99  | ORF1ab | IPGIPKDMT   | 100% (456/456)   | Non-Toxin | 9  |
| 100 | ORF1ab | FHTPAFDKS   | 98.24% (448/456) | Non-Toxin | 9  |
| 101 | ORF1ab | KGHFDGQQG   | 100% (456/456)   | Non-Toxin | 9  |
| 102 | ORF1ab | GVVQQLPET   | 99.78% (455/456) | Non-Toxin | 9  |
| 103 | ORF1ab | IERYKLEGY   | 99.34% (453/456) | Non-Toxin | 9  |
| 104 | ORF1ab | VEKGVLPQLE  | 99.78% (455/456) | Non-Toxin | 10 |
| 105 | ORF1ab | SEKSYELQTP  | 99.56% (454/456) | Non-Toxin | 10 |
| 106 | ORF1ab | CHNSEVGPEH  | 99.12% (452/456) | Non-Toxin | 10 |
| 107 | ORF1ab | CVKSREETGL  | 99.56% (454/456) | Non-Toxin | 10 |
| 108 | ORF1ab | SYKDWSYSGQ  | 99.78% (455/456) | Non-Toxin | 10 |
| 109 | ORF1ab | ALLTKSSEYK  | 99.78% (455/456) | Non-Toxin | 10 |
| 110 | ORF1ab | QLTGYYKPPAS | 99.56% (454/456) | Non-Toxin | 10 |
| 111 | ORF1ab | ILKPANNSLK  | 99.56% (454/456) | Non-Toxin | 10 |
| 112 | ORF1ab | YNYEPLTQDH  | 98.24% (448/456) | Non-Toxin | 10 |
| 113 | ORF1ab | EQAVANGDSE  | 99.78% (455/456) | Non-Toxin | 10 |
| 114 | ORF1ab | PEANMDQESF  | 99.78% (455/456) | Non-Toxin | 10 |
| 115 | ORF1ab | PCGTGTSTDV  | 97.58% (445/456) | Non-Toxin | 10 |
| 116 | ORF1ab | FQEKEDDNL   | 98.90% (451/456) | Non-Toxin | 10 |
| 117 | ORF1ab | TFSNYQHEET  | 100% (456/456)   | Non-Toxin | 10 |
| 118 | ORF1ab | FFKFRIDGDM  | 99.56% (454/456) | Non-Toxin | 10 |
| 119 | ORF1ab | LKYAISAKNR  | 99.78% (455/456) | Non-Toxin | 10 |
| 120 | ORF1ab | YASQGLVASI  | 99.56% (454/456) | Non-Toxin | 10 |
| 121 | ORF1ab | WTETDLTKGP  | 99.78% (455/456) | Non-Toxin | 10 |



|     |        |                    |                  |           |    |
|-----|--------|--------------------|------------------|-----------|----|
| 122 | ORF1ab | QVNGYPNMF1         | 100% (456/456)   | Non-Toxin | 10 |
| 123 | ORF1ab | YKRDAPAHIS         | 100% (456/456)   | Non-Toxin | 10 |
| 124 | ORF1ab | RVDGQVDLFR         | 98.90% (451/456) | Non-Toxin | 10 |
| 125 | ORF1ab | HTKKWKYPQVN        | 99.12% (452/456) | Non-Toxin | 11 |
| 126 | ORF1ab | KRPINPTDQSS        | 99.34% (453/456) | Non-Toxin | 11 |
| 127 | ORF1ab | LFSTVFPPTSF        | 72.58% (331/456) | Non-Toxin | 11 |
| 128 | ORF1ab | VGKPRPPLNRN        | 99.34% (453/456) | Non-Toxin | 11 |
| 129 | ORF1ab | RVLSNLSLPGC        | 98.90% (451/456) | Non-Toxin | 11 |
| 130 | ORF1ab | DIAKKPTETIC        | 99.78% (455/456) | Non-Toxin | 11 |
| 131 | ORF1ab | YHNESGLKTILR       | 99.78% (455/456) | Non-Toxin | 12 |
| 132 | ORF1ab | EGETLPTVLTTE       | 99.56% (454/456) | Non-Toxin | 12 |
| 133 | ORF1ab | KHYTPSFKKGAK       | 99.56% (454/456) | Non-Toxin | 12 |
| 134 | ORF1ab | RQGFVDSVETK        | 99.78% (455/456) | Non-Toxin | 12 |
| 135 | ORF1ab | SDVLLPLTQYNR       | 99.78% (455/456) | Non-Toxin | 12 |
| 136 | ORF1ab | KLQNNELSPVAL       | 99.56% (454/456) | Non-Toxin | 12 |
| 137 | ORF1ab | MHAASGNLLLDK       | 99.78% (455/456) | Non-Toxin | 12 |
| 138 | ORF1ab | KPGGTSSGDATT       | 100% (456/456)   | Non-Toxin | 12 |
| 139 | ORF1ab | TNDNTRRYWEPE       | 100% (456/456)   | Non-Toxin | 12 |
| 140 | ORF1ab | PYVCNAPGCDVT       | 100% (456/456)   | Non-Toxin | 12 |
| 141 | ORF1ab | GCHATREAVGTN       | 98.24% (448/456) | Non-Toxin | 12 |
| 142 | ORF1ab | SVKGLQPSVGPK       | 99.78% (455/456) | Non-Toxin | 12 |
| 143 | ORF1ab | LNDFVSDADSTL       | 99.78% (455/456) | Non-Toxin | 12 |
| 144 | ORF1ab | YILPSIISNEKQE      | 100% (456/456)   | Non-Toxin | 13 |
| 145 | ORF1ab | GLNLEEAARYMRS      | 100% (456/456)   | Non-Toxin | 13 |
| 146 | ORF1ab | FDNLKLLSLREV       | 99.78% (455/456) | Non-Toxin | 13 |
| 147 | ORF1ab | EQFKKGVPQIPCTC     | 99.56% (454/456) | Non-Toxin | 13 |
| 148 | ORF1ab | EDMLNPNYEDLLI      | 99.56% (454/456) | Non-Toxin | 13 |
| 149 | ORF1ab | RNVATLQAENVTG      | 100% (456/456)   | Non-Toxin | 13 |
| 150 | ORF1ab | PKTKNVTKENDSK      | 98.90% (451/456) | Non-Toxin | 13 |
| 151 | ORF1ab | YNKYKYFSGAMDTT     | 99.56% (454/456) | Non-Toxin | 14 |
| 152 | ORF1ab | EEAIRHVRAWIGFD     | 100% (456/456)   | Non-Toxin | 14 |
| 153 | ORF1ab | CGETSWQTGDFVKAT    | 99.34% (453/456) | Non-Toxin | 15 |
| 154 | ORF1ab | LQPLEQPTSEAVEAP    | 99.56% (454/456) | Non-Toxin | 15 |
| 155 | ORF1ab | VSELLTPLGIDLDEW    | 99.78% (455/456) | Non-Toxin | 15 |
| 156 | ORF1ab | SKHTDFSSEIIGYKA    | 98.90% (451/456) | Non-Toxin | 15 |
| 157 | ORF1ab | PAPRLLTKGTLEPE     | 99.34% (453/456) | Non-Toxin | 15 |
| 158 | ORF1ab | KRNIKPVPEVKLNN     | 98.90% (451/456) | Non-Toxin | 15 |
| 159 | ORF1ab | RFKESPFLEDFIPM     | 99.34% (453/456) | Non-Toxin | 15 |
| 160 | ORF1ab | GTENLTKEGATTCGYLP  | 99.12% (452/456) | Non-Toxin | 17 |
| 161 | ORF1ab | DFDTWFSQRGGSYTNDK  | 99.78% (455/456) | Non-Toxin | 17 |
| 162 | ORF1ab | TANPKTPKYKFRIQPG   | 99.12% (452/456) | Non-Toxin | 17 |
| 163 | ORF1ab | DDYFNKKDWYDFVENPD  | 98.90% (451/456) | Non-Toxin | 17 |
| 164 | ORF1ab | LQKEKVNINIVGDFKLNE | 100% (456/456)   | Non-Toxin | 18 |

|     |           |                      |                   |           |    |
|-----|-----------|----------------------|-------------------|-----------|----|
| 165 | ORF1ab    | WDTIANYAKPFLNKVVST   | 98.68% (450/456)  | Non-Toxin | 18 |
| 166 | ORF1ab    | AVTAYNGYLTSSSKTPEEH  | 100% (456/456)    | Non-Toxin | 19 |
| 167 | ORF1ab    | GCSCDQLREPMLQSADAQS  | 98.90% (451/456)  | Non-Toxin | 19 |
| 168 | ORF1ab    | PNNTDFSRVSAKPPPGDQF  | 99.78% (455/456)  | Non-Toxin | 19 |
| 169 | ORF1ab    | RMLLEKCDLQNYGDSATLP  | 100% (456/456)    | Non-Toxin | 19 |
| 170 | ORF1ab    | IVSTIQRKYKGIKIQEGVVD | 99.12% (452/456)  | Non-Toxin | 20 |
| 171 | ORF1ab    | GTTQTACTDDNALAYYNTTK | 99.78% (455/456)  | Non-Toxin | 20 |
| 172 | ORF1ab    | IQLSSYSLFDMSKFPLKLRG | 98.46% (449/456)  | Non-Toxin | 20 |
| 173 | ORF3a     | SKNPLL               | 96.25% (463/481)  | Non-Toxin | 6  |
| 174 | ORF3a     | PYNSVT               | 97.92% (471/481)  | Non-Toxin | 6  |
| 175 | ORF3a     | STQLSTDTGV           | 99.58%(479/481)   | Non-Toxin | 10 |
| 176 | ORF3a     | KIITLKKRWQL          | 99.37% (478/481)  | Non-Toxin | 11 |
| 177 | ORF3a     | QGEIKDATPSDF         | 99.37% (478/481)  | Non-Toxin | 12 |
| 178 | ORF6      | LTENKYSQLDEEQP       | 99.17% (477/481)  | Non-Toxin | 14 |
| 179 | ORF7a     | LYHYQECVR            | 99.79% (479/480)  | Non-Toxin | 9  |
| 180 | ORF7b     | ELQDHNE              | 100.00% (236/236) | Non-Toxin | 7  |
| 181 | ORF8      | QEPKL                | 100.00% (480/480) | Non-Toxin | 5  |
| 182 | ORF8      | EDFLEY               | 99.79% (479/480)  | Non-Toxin | 6  |
| 183 | ORF8      | RVGARKSAP            | 99.17% (476/480)  | Non-Toxin | 9  |
| 184 | ORF8      | DEAGSKSPIQYIDIGN     | 98.96% (475/480)  | Non-Toxin | 16 |
| 185 | S protein | LDPL                 | 99.58% (470/472)  | Non-Toxin | 4  |
| 186 | S protein | QTLE                 | 100.00% (472/472) | Non-Toxin | 4  |
| 187 | S protein | LGKY                 | 100.00% (472/472) | Non-Toxin | 4  |
| 188 | S protein | TNTSN                | 100.00% (472/472) | Non-Toxin | 5  |
| 189 | S protein | EAEVQ                | 99.15% (468/472)  | Non-Toxin | 5  |
| 190 | S protein | EQDKNTQ              | 99.15% (468/472)  | Non-Toxin | 7  |
| 191 | S protein | SNKKFLPF             | 100.00% (472/472) | Non-Toxin | 8  |
| 192 | S protein | PDPSKPSK             | 98.31% (464/472)  | Non-Toxin | 8  |
| 193 | S protein | GQSKRVDFC            | 100.00% (472/472) | Non-Toxin | 9  |
| 194 | S protein | TPGDSSSGWTA          | 99.58% (470/472)  | Non-Toxin | 11 |
| 195 | S protein | RVYSTGSNVFQ          | 99.79% (471/472)  | Non-Toxin | 11 |
| 196 | S protein | VNNSYECDIPI          | 100.00% (472/472) | Non-Toxin | 11 |
| 197 | S protein | RNFYEPQIITTD         | 99.36% (469/472)  | Non-Toxin | 12 |
| 198 | S protein | MDLEGKQGNFKNL        | 98.52% (465/472)  | Non-Toxin | 13 |
| 199 | S protein | KQIYKTPPIKDFGGF      | 98.09% (463/472)  | Non-Toxin | 15 |
| 200 | S protein | LADAGFIKQYGDCLG      | 99.36% (469/472)  | Non-Toxin | 15 |
| 201 | S protein | KHTPINLVRDLPPQGF     | 99.58% (470/472)  | Non-Toxin | 16 |
| 202 | S protein | YTMSLGAENSVAYSNN     | 100.00% (472/472) | Non-Toxin | 16 |
| 203 | S protein | DPFLGVYYHKNNKSWME    | 98.09% (463/472)  | Non-Toxin | 17 |
| 204 | S protein | NCTEVPVAIHADQLTPT    | 100.00% (472/472) | Non-Toxin | 17 |
| 205 | S protein | KSFTVEKGIYQTSNFRVQP  | 99.36% (469/472)  | Non-Toxin | 19 |
| 206 | S protein | ASYQTQTNSPRRARSVASQ  | 100.00% (472/472) | Non-Toxin | 19 |

**Supplementary table S12.** World population coverage by the shortlisted SARS-CoV-2 CTL and HTL epitopes combined. With a standard deviation of 23.74 on an average 96.10 % of the world population could be covered by the joint administration of selected CTL and HTL epitopes (given in Table 1 and 2) as vaccine candidates.

| Population/area          | Class I and II combined |                          |                   |
|--------------------------|-------------------------|--------------------------|-------------------|
|                          | % coverage <sup>a</sup> | average_hit <sup>b</sup> | pc90 <sup>c</sup> |
| Algeria                  | 27.85%                  | 1.51                     | 0.69              |
| American Samoa           | 70.35%                  | 1.93                     | 0.34              |
| Argentina                | 96.78%                  | 3.56                     | 1.35              |
| Australia                | 79.62%                  | 2.73                     | 0.49              |
| Austria                  | 99.28%                  | 7.17                     | 2.74              |
| Belgium                  | 97.21%                  | 4.63                     | 1.71              |
| Bolivia                  | 35.81%                  | 2.14                     | 0.77              |
| Brazil                   | 92.28%                  | 3.69                     | 1.15              |
| Bulgaria                 | 95.49%                  | 4.48                     | 1.64              |
| Burkina Faso             | 61.26%                  | 1.3                      | 0.26              |
| Cameroon                 | 88.90%                  | 2.71                     | 0.9               |
| Cape Verde               | 98.02%                  | 5.71                     | 2.07              |
| Central Africa           | 87.66%                  | 3.35                     | 0.81              |
| Central African Republic | 36.40%                  | 1.25                     | 0.16              |
| Chile                    | 90.76%                  | 4.36                     | 1.06              |
| China                    | 90.43%                  | 4.74                     | 1.05              |
| Colombia                 | 24.90%                  | 1.18                     | 0.27              |
| Congo                    | 29.65%                  | 1.58                     | 0.64              |
| Cook Islands             | 22.52%                  | 1.33                     | 0.65              |
| Croatia                  | 97.46%                  | 5.28                     | 1.97              |
| Cuba                     | 97.36%                  | 6.08                     | 2.03              |
| Czech Republic           | 98.68%                  | 5.99                     | 2.31              |
| Denmark                  | 59.30%                  | 3.61                     | 1.23              |
| East Africa              | 90.29%                  | 3.46                     | 1.02              |
| East Asia                | 93.23%                  | 5.49                     | 1.29              |
| England                  | 99.45%                  | 7.37                     | 3.14              |
| Equatorial Guinea        | 15.47%                  | 0.81                     | 0.58              |
| Ethiopia                 | 34.14%                  | 1.72                     | 0.71              |
| Europe                   | 98.35%                  | 6.12                     | 2.32              |
| Finland                  | 99.58%                  | 5.27                     | 2.46              |
| France                   | 98.20%                  | 6.39                     | 2.31              |
| Georgia                  | 93.92%                  | 4.08                     | 1.31              |
| Germany                  | 99.34%                  | 7.17                     | 2.92              |
| Greece                   | 26.34%                  | 1.51                     | 0.68              |

|                       |        |      |      |
|-----------------------|--------|------|------|
| Guinea-Bissau         | 95.03% | 4.49 | 1.37 |
| Hong Kong             | 84.82% | 2.7  | 0.66 |
| India                 | 86.82% | 3.86 | 0.76 |
| Indonesia             | 78.44% | 2.93 | 0.46 |
| Iran                  | 94.14% | 4.47 | 1.45 |
| Ireland Northern      | 99.55% | 7.7  | 3.3  |
| Ireland South         | 99.28% | 7.31 | 3.16 |
| Israel                | 84.33% | 3.49 | 0.64 |
| Italy                 | 96.70% | 4.11 | 1.74 |
| Ivory Coast           | 65.09% | 1.16 | 0.29 |
| Japan                 | 92.78% | 5.3  | 1.23 |
| Jordan                | 85.10% | 3.54 | 0.67 |
| Kenya                 | 86.65% | 2.27 | 0.75 |
| Korea; South          | 95.79% | 6.18 | 1.72 |
| Macedonia             | 43.69% | 2.18 | 0.18 |
| Malaysia              | 80.94% | 3.79 | 0.52 |
| Mali                  | 95.75% | 2.67 | 1.3  |
| Martinique            | 43.47% | 1.8  | 0.18 |
| Mexico                | 93.68% | 3.6  | 1.35 |
| Mongolia              | 87.03% | 4.25 | 0.77 |
| Morocco               | 97.32% | 5.55 | 2.01 |
| Netherlands           | 40.49% | 2.35 | 0.84 |
| New Caledonia         | 61.85% | 2.73 | 0.26 |
| New Zealand           | 24.11% | 1.39 | 0.66 |
| Niue                  | 20.26% | 1.2  | 0.63 |
| North Africa          | 94.14% | 4.19 | 1.3  |
| North America         | 97.36% | 6    | 2.09 |
| Northeast Asia        | 90.30% | 4.71 | 1.04 |
| Norway                | 52.39% | 3.08 | 1.05 |
| Oceania               | 75.64% | 3.29 | 0.41 |
| Oman                  | 94.27% | 3.2  | 1.35 |
| Pakistan              | 85.00% | 2.54 | 0.67 |
| Papua New Guinea      | 71.23% | 3.29 | 0.35 |
| Peru                  | 95.12% | 3.38 | 1.52 |
| Philippines           | 67.23% | 1.92 | 0.61 |
| Poland                | 98.46% | 6.18 | 2.36 |
| Portugal              | 96.27% | 5.25 | 1.75 |
| Romania               | 95.90% | 3.54 | 1.56 |
| Russia                | 94.88% | 5.26 | 1.49 |
| Rwanda                | 45.12% | 1.85 | 0.18 |
| Samoa                 | 43.64% | 2.65 | 0.89 |
| Sao Tome and Principe | 96.32% | 4.15 | 1.54 |
| Saudi Arabia          | 96.53% | 4.87 | 1.65 |
| Scotland              | 73.06% | 4.19 | 0.37 |

|                    |        |      |      |
|--------------------|--------|------|------|
| Senegal            | 94.11% | 3.54 | 1.24 |
| Serbia             | 62.91% | 1.07 | 0.27 |
| Singapore          | 86.92% | 4.37 | 0.76 |
| Slovenia           | 43.37% | 2.58 | 0.88 |
| South Africa       | 88.81% | 2.6  | 0.89 |
| South America      | 81.68% | 2.95 | 0.55 |
| South Asia         | 90.37% | 4.25 | 1.03 |
| Southeast Asia     | 82.33% | 3.79 | 0.57 |
| Southwest Asia     | 86.38% | 3.13 | 0.73 |
| Spain              | 87.57% | 3.8  | 0.8  |
| Sri Lanka          | 52.39% | 1.59 | 0.42 |
| Sudan              | 87.98% | 2.69 | 0.83 |
| Sweden             | 99.29% | 7.32 | 2.59 |
| Taiwan             | 84.93% | 4.28 | 0.66 |
| Thailand           | 91.26% | 4.81 | 1.17 |
| Tonga              | 33.43% | 1.98 | 0.69 |
| Tunisia            | 94.64% | 4.17 | 1.38 |
| Turkey             | 61.05% | 2.54 | 0.51 |
| Uganda             | 92.00% | 2.99 | 1.13 |
| United States      | 97.45% | 6.04 | 2.11 |
| Venezuela          | 69.56% | 1.16 | 0.33 |
| Vietnam            | 86.19% | 4.11 | 0.72 |
| West Africa        | 94.34% | 4.44 | 1.32 |
| West Indies        | 96.71% | 5.04 | 1.74 |
| Zambia             | 97.50% | 3.1  | 1.67 |
| Zimbabwe           | 93.60% | 3.4  | 1.21 |
|                    |        |      |      |
| World              | 96.10% | 5.55 | 1.8  |
|                    |        |      |      |
| Average            | 78.62  | 3.73 | 1.16 |
| Standard deviation | 23.74  | 1.67 | 0.73 |

<sup>a</sup> projected population coverage

<sup>b</sup> average number of epitope hits / HLA combinations recognized by the population

<sup>c</sup> minimum number of epitope hits / HLA combinations recognized by 90% of the population

## Supplementary Fig. S1. Workflow chart.

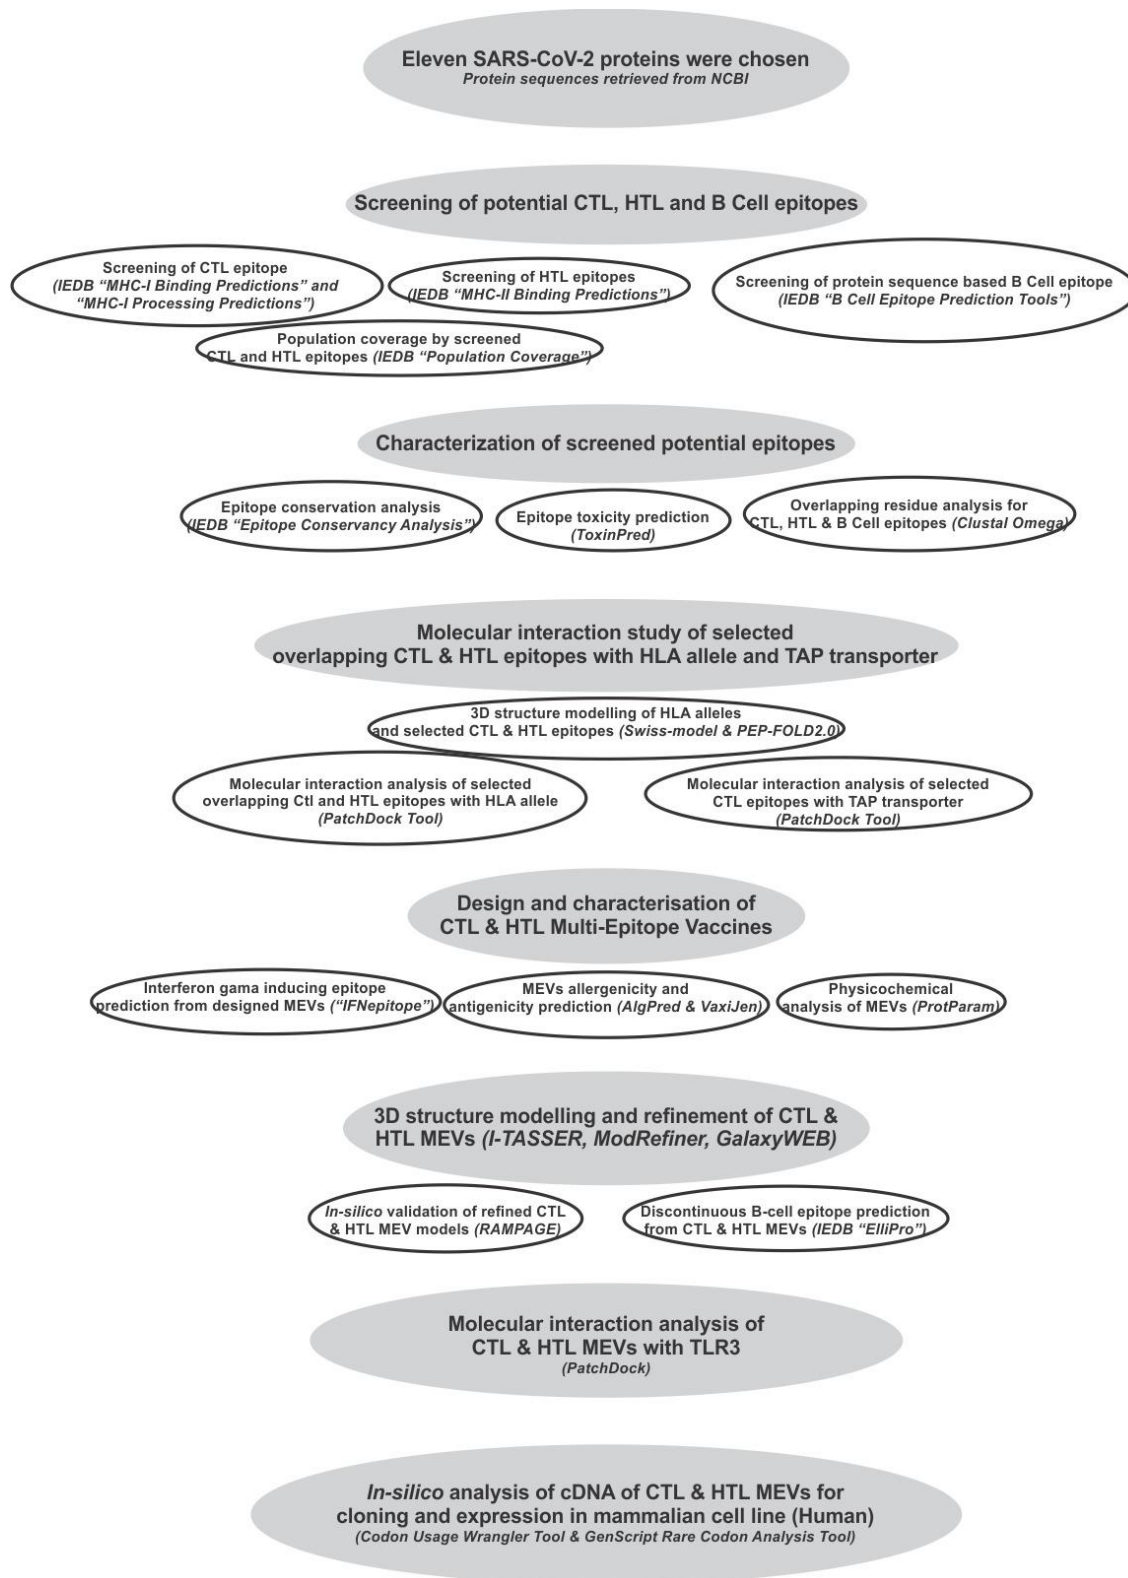

**Supplementary Fig. S2.** Design of SARS-CoV-2 Multi-Epitope Vaccine (MEVs). (A) CTL and (B) HTL epitopes were linked by the short peptide linker 'GGGGS'. Truncated (residues 10-153) *Onchocerca volvulus* activation-associated secreted protein-1 (Ov-ASP-1) has been utilized at the N terminal of both the MEVs. The short peptide EAAAK was used to link Ov-ASP-1 at N terminal. Epitopes from different proteins were colored in different colors. C terminal 6xHis is designed as His tag.

**A. CTL epitopes**

**B. HTL epitopes**

**Ov-ASP-1**  
(truncated  
(10-153))

IVVAVTGYNCPGGKLTALERKKIVGQNNKYRSDLINGKL  
KNRNGTYMPRGKNMLELTWDCCKLESSAQRWANQCIFG  
HSPRQQREGVGENVYAYWSSVSVEGLKKTAGTDAGKS  
WWSKLPKLYENNPNNMTWKVAGQGVLLHFTQ

**Envelope protein**

**Membrane protein**

**N protein**

**ORF1ab**

**ORF3a**

**ORF6**

**ORF7a**

**ORF7b**

**ORF8**

**ORF10**

**Surface protein**

EAAAK  
LLFLAFVFLVTLA  
GGGGG  
VLLFLAFVFLVTL  
GGGGG  
GLMWLSYFIASFRLF  
GGGGG  
LMWLSYFIASFRLF  
GGGGG  
LSYYKLGASQRVAGD  
GGGGG  
AQFAPSASAFFGMSR  
GGGGG  
IAQFAPSASAFFGMS  
GGGGG  
PQIAQFAPSASAFFG  
GGGGG  
AIIASFASASTSAFV  
GGGGG  
ESPFVMSAPPAQYE  
GGGGG  
IILASFASASTSAFVE  
GGGGG  
QESPFVMSAPPAQY  
GGGGG  
SPFVMSAPPAQYEL  
GGGGG  
FVRATATIPIQASLP  
GGGGG  
LLFVTVYSHLLLVA  
GGGGG  
FKVSIWNLDYIINLI  
GGGGG  
KVSIWNLDYIINLI  
GGGGG  
TFKSIWNLDYIINL  
GGGGG  
IILFLALITLATCEL  
GGGGG  
ILFLALITLATCELY  
GGGGG  
CFLAFLFLVLI  
GGGGG  
LCFLAFLFLVLI  
GGGGG  
YLCFLAFLFLVLI  
GGGGG  
CTQHQPYYVDDPCPI  
GGGGG  
HQPYYVDDPCPIHFY  
GGGGG  
QPYYVDDPCPIHFYS  
GGGGG  
INVFAFPFTIYSLLL  
GGGGG  
YINVFAFPFTIYSL  
GGGGG  
KTQSLIVNNATNVV  
GGGGG  
LLIVNNATNVVIKVC  
GGGGG  
QSLIVNNATNVVIK  
GGGGG  
SLLIVNNATNVVIK  
GGGGG  
TQSLIVNNATNVVI  
GGGGG  
HHHHHH

EAAAK  
LLFLAFVVF  
GGGGG  
LTALRLCAY  
GGGGG  
YFIASFRLFAR  
GGGGG  
ATSRTLSEYK  
GGGGG  
MEVTPSGTW  
GGGGG  
KPRQKRTAT  
GGGGG  
MGYINVFAPF  
GGGGG  
GYINVFAPF  
HHHHHH  
SEMVMCGGSLY  
GGGGG  
FYWFFSNYLKR  
GGGGG  
ISNSWLMW  
GGGGG  
ETISLAGSYK  
GGGGG  
QEILGTVSW  
GGGGG  
STFNVPMEK  
GGGGG  
RMYIFFASFY  
GGGGG  
FLFVAIFYL  
GGGGG  
RYFRLTLGVY  
GGGGG  
FLNGSCGSV  
GGGGG  
CTDDNALAY  
GGGGG  
CTDDNALAY  
GGGGG  
MYKGLPWNVVR  
GGGGG  
SIINNTVYTK  
GGGGG  
LPVNVAFELW  
GGGGG  
DEWSMATYY  
GGGGG  
YILFTRFFVY  
GGGGG  
YIFFASFYYV  
GGGGG  
YLYALVYFL  
GGGGG  
IPYNSVTSSI  
GGGGG  
RTFKVSIW  
GGGGG  
AEILLIMRTF  
GGGGG  
RARSVSPK  
GGGGG  
QLRARSVSPK  
GGGGG  
FLAFLFLV  
GGGGG  
HFYSKWYIR  
GGGGG  
WTAGAAAYV  
GGGGG  
FPNITLCPF  
GGGGG  
NINYLYRFLR  
GGGGG  
NYLYRFLR  
HHHHHH



**Supplementary Fig. S3.** Overlapping SARS-CoV-2 CTL, HTL and B cell epitopes. Multiple sequence alignment performed by Clustal Omega at EBI to identify the consensus overlapping regions of CTL (red), HTL (blue) and B cell epitopes (green) amongst shortlisted epitopes. Epitopes with overlapping regions amongst all the three types of epitopes (CTL, HTL and B Cell epitopes) were chosen for further studies (encircled).

# Overlapping T & B cell epitopes across proteome of SARS-CoV-2

|                      |                                                                                                                                                                                                                                                                                                                                                                                                                                                                                                                                                                                                                                                                                                                                                                                                                                                                                                                                                                                                                                                                                                                                                                                                                                                                                                                                                                                                                                                                                                                                    |
|----------------------|------------------------------------------------------------------------------------------------------------------------------------------------------------------------------------------------------------------------------------------------------------------------------------------------------------------------------------------------------------------------------------------------------------------------------------------------------------------------------------------------------------------------------------------------------------------------------------------------------------------------------------------------------------------------------------------------------------------------------------------------------------------------------------------------------------------------------------------------------------------------------------------------------------------------------------------------------------------------------------------------------------------------------------------------------------------------------------------------------------------------------------------------------------------------------------------------------------------------------------------------------------------------------------------------------------------------------------------------------------------------------------------------------------------------------------------------------------------------------------------------------------------------------------|
| ORF1ab               | <p> <span style="color: blue;">-ILASFSASTSAFVE</span><br/> <span style="color: blue;">AIIASFSASTSAFV-</span><br/>           474-489 AIIASFSASTSAFVE         </p> <p> <span style="color: blue;">-SPFVMSAPPAQYEL</span><br/> <span style="color: blue;">QESPFVMSAPPAQY-</span><br/> <span style="color: blue;">-ESPFVMSAPPAQYE-</span><br/>           1800-1816 QESPFVMSAPPAQYEL         </p> <p> <span style="color: blue;">-----YILFTRFFVY----</span><br/> <span style="color: blue;">WFLAYILFTRFFVYL---</span><br/> <span style="color: blue;">----LAYILFTRFFVYVGL-</span><br/> <span style="color: blue;">---FLAYILFTRFFVYVGLA</span><br/> <span style="color: blue;">-----AYILFTRFFVYVGLA</span><br/>           2327-2344 WFLAYILFTRFFVYVGLA         </p> <p> <span style="color: red;">-----YIFFASFYVV</span><br/> <span style="color: red;">RMYIFFASFY--</span><br/>           2382-2393 RMYIFFASFYVV         </p> <p> <span style="color: red;">-----CTDDNALAY-----</span><br/> <span style="color: red;">-----CTDDNALAYY-----</span><br/> <span style="color: red;">GTTQACTDDNALAYNTTK</span><br/>           4157-4176 GTTQACTDDNALAYNTTK         </p> <p> <span style="color: blue;">RAMPNMLRIMASLVL---</span><br/> <span style="color: blue;">-----PNMLRIMASLVLARK-</span><br/> <span style="color: blue;">-----NMLRIMASLVLARKH</span><br/> <span style="color: blue;">---MPNMLRIMASLVLAR--</span><br/> <span style="color: blue;">--AMPNMLRIMASLVLA---</span><br/>           5016-5034 RAMPNMLRIMASLVLARKH         </p> |
| Surface protein      | <p> <span style="color: blue;">-----LLIVNNATNVVIKVC</span><br/> <span style="color: blue;">-----SLLIVNNATNVVIKV-</span><br/> <span style="color: blue;">---QSLIVNNATNVVIK--</span><br/> <span style="color: blue;">-TQSLIVNNATNVVI---</span><br/> <span style="color: blue;">KTQSLIVNNATNVV----</span><br/>           113-131 KTQSLIVNNATNVVIKVC         </p> <p> <span style="color: red;">-----WTAGAAAYYV</span><br/> <span style="color: red;">TPGDSSSGWTA-----</span><br/>           250-267 TPGDSSSGWTAGAAAYYV         </p> <p> <span style="color: red;">FPNITNLCPF-----</span><br/> <span style="color: red;">FPNITNLCPFGEVFNATRFASVYAWNRKRISNCVA</span><br/>           329-363 FPNITNLCPFGEVFNATRFASVYAWNRKRISNCVA         </p> <p> <span style="color: red;">-----NYNYLRLFR-----</span><br/> <span style="color: red;">-----NYLYRFR-----</span><br/> <span style="color: red;">NLDSKVGNGYNYLRLFRKSNLKPFERDISTEIQAGSTPCNGVEGFNCYFPLQSYGFQPTN</span><br/>           440-501 NLDSKVGNGYNYLRLFRKSNLKPFERDISTEIQAGSTPCNGVEGFNCYFPLQSYGFQPTN         </p>                                                                                                                                                                                                                                                                                                                                                                                                                                                                       |
| ORF3a                | <p> <span style="color: blue;">-----FVRATAPIQASLP</span><br/> <span style="color: blue;">QGEIKDATPSDF-----</span><br/>           17-42 QGEIKDATPSDFVRATAPIQASLP         </p> <p> <span style="color: red;">IPYNSVTSSI</span><br/> <span style="color: red;">-PYNSVT---</span><br/>           158-167 IPYNSVTSSI         </p>                                                                                                                                                                                                                                                                                                                                                                                                                                                                                                                                                                                                                                                                                                                                                                                                                                                                                                                                                                                                                                                                                                                                                                                                       |
| Envelope protein     | <p> <span style="color: red;">-LLFLAFVVF-----</span><br/> <span style="color: red;">-LLFLAFVVFLLVTLA</span><br/> <span style="color: red;">VLLFLAFVVFLLVTL-</span><br/> <span style="color: red;">VLLFLAFVVFLLVTLA</span><br/>           17-32         </p>                                                                                                                                                                                                                                                                                                                                                                                                                                                                                                                                                                                                                                                                                                                                                                                                                                                                                                                                                                                                                                                                                                                                                                                                                                                                        |
| Membrane Protein     | <p> <span style="color: red;">-----YFIASFRLFAR</span><br/> <span style="color: red;">-LMWLSYFIASFRLF-</span><br/> <span style="color: red;">GLMWLSYFIASFRLF--</span><br/>           89-105 GLMWLSYFIASFRLFAR         </p> <p> <span style="color: red;">ATSRTLSEYK-----</span><br/> <span style="color: red;">-----LSYKLGASQRVAGD-</span><br/> <span style="color: red;">-----KLGASQRVAGDS</span><br/>           171-191 ATSRTLSEYKLGASQRVAGDS         </p>                                                                                                                                                                                                                                                                                                                                                                                                                                                                                                                                                                                                                                                                                                                                                                                                                                                                                                                                                                                                                                                                        |
| ORF6                 | <p> <span style="color: red;">AEILLIMRTF-----</span><br/> <span style="color: red;">-----RTFKVSIW-----</span><br/> <span style="color: blue;">-----KVSINWLDYIINLII</span><br/> <span style="color: blue;">-----FKVSINWLDYIINLI-</span><br/> <span style="color: blue;">-----TFKVSINWLDYIINL-</span><br/>           12-37 AEILLIMRTFKVSINWLDYIINLII         </p>                                                                                                                                                                                                                                                                                                                                                                                                                                                                                                                                                                                                                                                                                                                                                                                                                                                                                                                                                                                                                                                                                                                                                                    |
| ORF7a                | <p> <span style="color: blue;">-ILFLALITLATCELY----</span><br/> <span style="color: blue;">ILFLALITLATCEL-----</span><br/> <span style="color: blue;">-----LYHYQECVR</span><br/>           3-25 ILFLALITLATCELYHYQECVR         </p> <p> <span style="color: red;">-----RARSVSPK-----</span><br/> <span style="color: red;">-----QLRARSVSPK-----</span><br/> <span style="color: red;">VKHVYQLRARSVSPKLFIRQEEVQEL</span><br/>           71-96 VKHVYQLRARSVSPKLFIRQEEVQEL         </p>                                                                                                                                                                                                                                                                                                                                                                                                                                                                                                                                                                                                                                                                                                                                                                                                                                                                                                                                                                                                                                               |
| ORF7b                | <p> <span style="color: red;">-----FLAFLFLV-----</span><br/> <span style="color: blue;">---CFLAFLFLVLIIMLI</span><br/> <span style="color: blue;">-LCFLAFLFLVLIIML-</span><br/> <span style="color: blue;">YLCFLAFLFLVLIIM-</span><br/> <span style="color: blue;">YLCFLAFLFLVLIIMLI</span><br/>           10-26         </p>                                                                                                                                                                                                                                                                                                                                                                                                                                                                                                                                                                                                                                                                                                                                                                                                                                                                                                                                                                                                                                                                                                                                                                                                      |
| ORF8                 | <p> <span style="color: red;">-----HFYSKWYIR-----</span><br/> <span style="color: blue;">-----QPYYVDDPCPIHFYS</span><br/> <span style="color: blue;">-----HQPYVDDPCPIHFY</span><br/> <span style="color: blue;">---CTQHQPYYVDDPCPI---</span><br/> <span style="color: blue;">QSCTQHQPYYVDDPCPIHFYSKW-----</span><br/> <span style="color: blue;">-----RVGARKSAP</span><br/>           23-56 QSCTQHQPYYVDDPCPIHFYSKWYIRVGARKSAP         </p>                                                                                                                                                                                                                                                                                                                                                                                                                                                                                                                                                                                                                                                                                                                                                                                                                                                                                                                                                                                                                                                                                        |
| Nucleocapsid Protein | <p> <span style="color: red;">-----KPRQKRTAT--</span><br/> <span style="color: red;">RLNQLESKMSGKQQQGGQVTTKKSAEASKPRQKRTATKA</span><br/>           226-267 RLNQLESKMSGKQQQGGQVTTKKSAEASKPRQKRTATKA         </p> <p> <span style="color: blue;">-----AQFAPSASAFFGMSR</span><br/> <span style="color: blue;">---IAQFAPSASAFFGMS-</span><br/> <span style="color: blue;">PQIAQFAPSASAFFG---</span><br/> <span style="color: blue;">PQIAQFAPSASAFFGMSR</span><br/>           302-319         </p>                                                                                                                                                                                                                                                                                                                                                                                                                                                                                                                                                                                                                                                                                                                                                                                                                                                                                                                                                                                                                                      |
| ORF10                | <p> <span style="color: red;">---GYINVFAPPF-----</span><br/> <span style="color: red;">MGYINVFAP-----</span><br/> <span style="color: blue;">---YINVFAPFTIYSLL</span><br/>           1-17 MGYINVFAPFTIYSLL         </p>                                                                                                                                                                                                                                                                                                                                                                                                                                                                                                                                                                                                                                                                                                                                                                                                                                                                                                                                                                                                                                                                                                                                                                                                                                                                                                            |

**Supplementary Fig. S4.** B-Factor of CTL and HTL epitope in complex with HLA class I and II allele. CTL and HTL Epitopes are shown in sticks and HLA Class I and II alleles are shown in ribbon. The HLA alleles are shown in gray. The regions of the epitope in the complex are shown in a rainbow (VIBGYOR), the regions in blue being very stable and the region towards red being relatively unstable. In the complexes shown above, most of the regions of epitopes are in blue indicating the complexes to be highly stable.

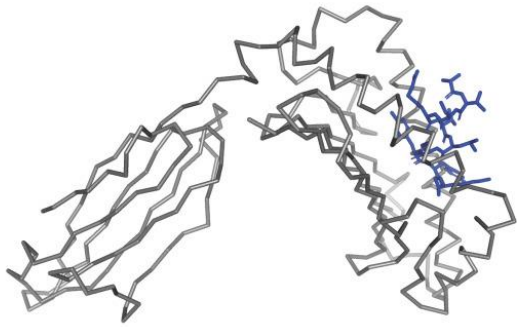

1. ATSRTLSYYK-HLA-A\*11:01

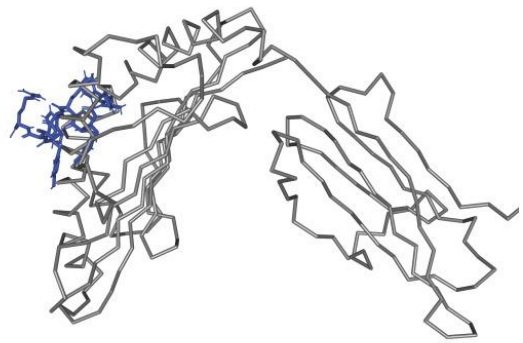

2. HFYSKQYIR-HLA-A\*31:01

**CTL epitopes - HLA Class I allele complexes**

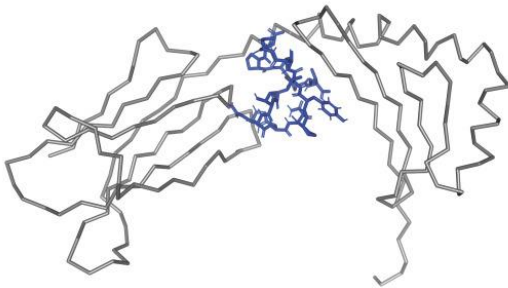

3. CTQHQPYYVDDPCPI-HLA-DRB3\*01:01

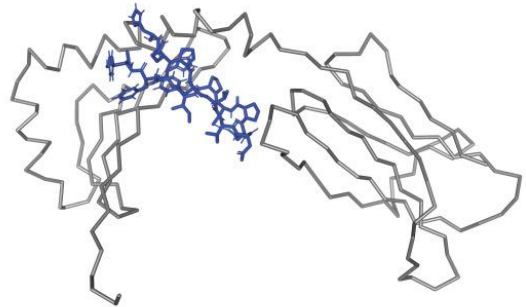

4. HQPYVDDPCPIHFY-HLA-DRB3\*01:01

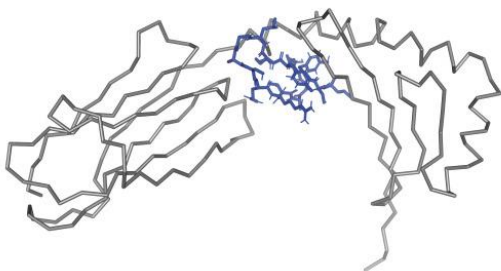

5. LSYYKLGASQRVAGD-HLA-DRB1\*09:01

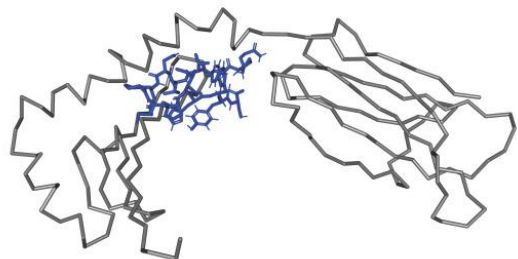

6. QPYVDDPCPIHFYS-HLA-DRB3\*01:01

**HTL epitopes - HLA Class II allele complexes**

**Supplementary Fig. S5.** RAMPAGE analysis of CTL and HTL MEVs. The RAMPAGE analysis of both the CTL and HTL MEVs has been done and shown here.

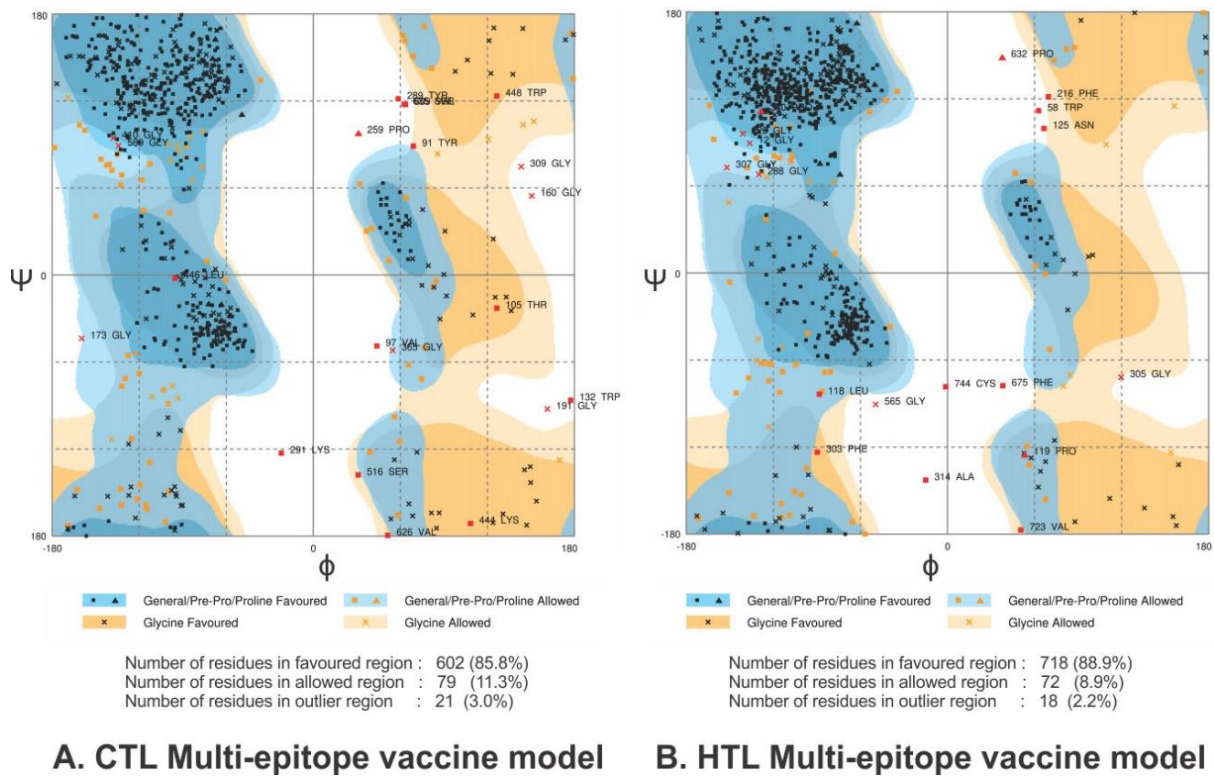

Supplement: bioinform_v1i1e19371_app1.pdf [file bioinform_v1i1e19371_app1.pdf]
